# Supplementary material
Source: publisher site journal article supplement (https://www.dovepress.com/article/434919)
Supplement: Supplementary file 1 [file get_supplementary_file.php]

**Supplementary Materials**


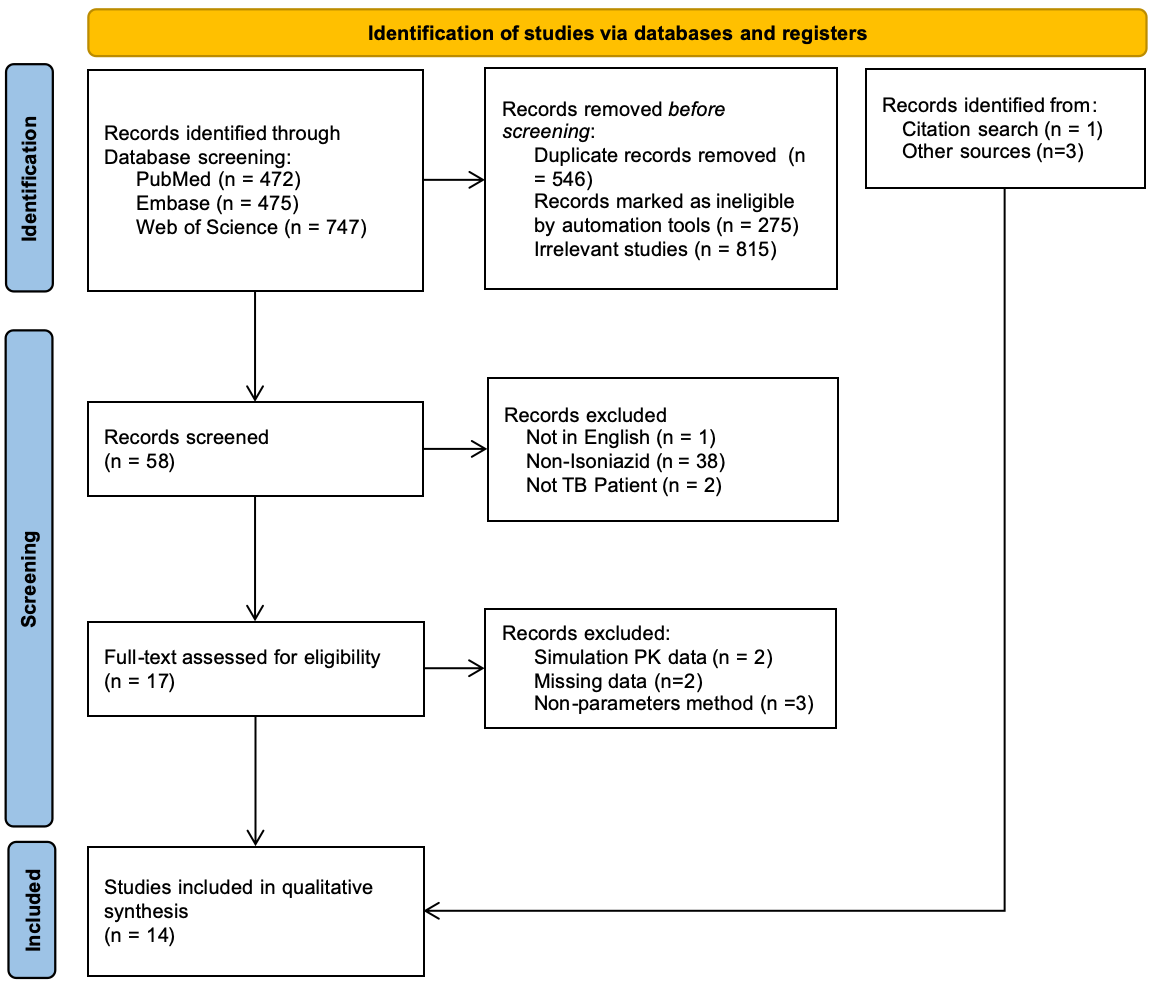


Figure S1. PRISMA flow diagram for the identification of isoniazid popPK studies.

Abbreviation: PRISMA Preferred Reporting Items for Systematic Reviews and Meta-analysis.

Table S1. Checklist of information to be included when reporting a clinical pharmacokinetic study.

| **Study Items** | | 1 | 2 | 3 | 4 | 5 | 6 | 7 | 8 | 9 | 10 | 11 | 12 | 13 | 14 |
| --- | --- | --- | --- | --- | --- | --- | --- | --- | --- | --- | --- | --- | --- | --- | --- |
| **Title/abstract** | Drug and patient population | 1 | 0.5 | 0.5 | 1 | 1 | 1 | 1 | 1 | 1 | 1 | 1 | 1 | 1 | 1 |
|  | Name of the drug(s) studied | 1 | 1 | 1 | 1 | 1 | 1 | 1 | 1 | 1 | 1 | 1 | 1 | 1 | 1 |
|  | Population studied | 1 | 1 | 1 | 1 | 1 | 1 | 1 | 1 | 1 | 1 | 1 | 1 | 1 | 1 |
|  | Primary objective | 1 | 1 | 1 | 1 | 1 | 1 | 1 | 1 | 1 | 1 | 1 | 1 | 1 | 1 |
|  | Major findings | 1 | 1 | 1 | 1 | 1 | 1 | 1 | 1 | 1 | 1 | 1 | 1 | 1 | 1 |
| **Background** | Pharmacokinetic data | 1 | 1 | 1 | 1 | 1 | 1 | 1 | 1 | 1 | 1 | 1 | 1 | 1 | 1 |
|  | Study rationale | 1 | 1 | 1 | 1 | 1 | 1 | 1 | 1 | 1 | 1 | 1 | 1 | 1 | 1 |
|  | Specific objectives/hypotheses | 1 | 1 | 1 | 1 | 1 | 1 | 1 | 1 | 1 | 1 | 1 | 1 | 1 | 1 |
| **Methods** | Eligibility criteria | 1 | 1 | 1 | 1 | 1 | 1 | 1 | 1 | 1 | 1 | 1 | 1 | 1 | 1 |
|  | Ethic requirement | 1 | 1 | 1 | 1 | 1 | 1 | 1 | 1 | 1 | 1 | 1 | 1 | 1 | 1 |
|  | Administration strategy | 1 | 1 | 1 | 1 | 1 | 1 | 1 | 1 | 1 | 1 | 1 | 1 | 1 | 1 |
|  | Covariates | 1 | 1 | 1 | 1 | 1 | 1 | 1 | 1 | 1 | 1 | 1 | 1 | 1 | 1 |
|  | Sampling schedule | 1 | 1 | 1 | 1 | 1 | 1 | 1 | 1 | 1 | 1 | 1 | 1 | 1 | 1 |
|  | Bioanalytical methods | 1 | 1 | 1 | 1 | 1 | 1 | 1 | 1 | 1 | 1 | 1 | 1 | 1 | 1 |
|  | Missing data handling | 1 | 1 | 0 | 0 | 1 | 0 | 0 | 1 | 0 | 0 | 0 | 0 | 0 | 0 |
|  | Modeling software | 1 | 1 | 1 | 1 | 1 | 1 | 1 | 1 | 1 | 1 | 1 | 1 | 1 | 1 |
|  | Statistical methods and software | 1 | 1 | 1 | 1 | 1 | 1 | 1 | 1 | 1 | 1 | 1 | 1 | 1 | 1 |
|  | Candidate structural models | 1 | 1 | 1 | 1 | 1 | 1 | 1 | 1 | 1 | 1 | 1 | 1 | 1 | 1 |
|  | Residual error structure | 1 | 1 | 1 | 1 | 1 | 1 | 1 | 1 | 1 | 1 | 1 | 1 | 1 | 1 |
|  | Base model determination and evaluation | 1 | 1 | 1 | 1 | 1 | 1 | 1 | 1 | 1 | 1 | 1 | 1 | 1 | 1 |
|  | Covariates analysis strategy | 0 | 1 | 0 | 1 | 1 | 1 | 1 | 0.5 | 1 | 1 | 1 | 1 | 1 | 0.5 |
|  | Final model evaluation | 1 | 1 | 1 | 1 | 1 | 1 | 1 | 1 | 1 | 1 | 1 | 1 | 1 | 1 |
|  | Distribution of individual model parameters | 1 | 1 | 1 | 1 | 1 | 1 | 1 | 1 | 1 | 1 | 1 | 1 | 1 | 1 |
|  | Estimation method(s) used | 1 | 1 | 1 | 1 | 1 | 1 | 1 | 1 | 1 | 1 | 1 | 1 | 1 | 1 |
| **Results** | Population characteristic | 1 | 1 | 1 | 1 | 1 | 1 | 1 | 1 | 1 | 1 | 1 | 1 | 1 | 1 |
|  | Number of subjects and observations | 1 | 1 | 1 | 1 | 1 | 0.5 | 1 | 1 | 1 | 1 | 1 | 1 | 1 | 1 |
|  | Schematic of the final model | 0 | 0 | 0 | 0 | 1 | 1 | 0 | 1 | 0 | 0 | 0 | 0 | 0 | 0 |
|  | Table of the final model parameters | 1 | 1 | 1 | 1 | 1 | 1 | 1 | 1 | 1 | 1 | 1 | 1 | 1 | 1 |
|  | Final model evaluation plots | 1 | 1 | 1 | 1 | 1 | 1 | 1 | 1 | 1 | 0 | 1 | 1 | 1 | 1 |
|  | Summary of the model-building process and the derived final model | 1 | 1 | 1 | 1 | 1 | 1 | 1 | 1 | 1 | 1 | 1 | 1 | 1 | 1 |
|  | Plot of concentrations vs. time | 1 | 1 | 0 | 1 | 0 | 0.5 | 1 | 0 | 1 | 1 | 1 | 1 | 1 | 1 |
| **Discussion/conclusion** | Study limitations | 1 | 1 | 1 | 1 | 1 | 1 | 1 | 1 | 1 | 1 | 1 | 1 | 1 | 1 |
|  | Study findings | 1 | 1 | 1 | 1 | 1 | 1 | 1 | 1 | 1 | 1 | 1 | 1 | 1 | 1 |
| **Overall** | Mean: 93.5 | 93.9 | 95.5 | 86.4 | 93.9 | 97.0 | 93.9 | 93.9 | 95.5 | 93.9 | 90.9 | 93.9 | 93.9 | 93.9 | 92.4 |

Note: Study1 to 14 [Soedarsono S. (2022)28, Horita Y. (2018)29, Denti P. (2022)30, Jing W. (2020)31, Panjasawatwong N. (2020)32, Chen B. (2022)33, Huerta-García AP. (2020)34, Abdelwahab MT. (2020)35, Wilkins JJ. (2011)13, McCallum AD. (2021)36, Gao Y. (2021)37, Sundell J. (2020)38, Cho Y. S. (2021)39, Naidoo A. (2019)40]. 1: Mentioned; 0.5: Not clear; 0: Not mentioned.

Table S2. List of tested and significant covariates in the model.

| **Study**  **(publication year)** | **Tested covariates** | | | **Covariate selection criteria** | | **Significant covariates** | | | |
| --- | --- | --- | --- | --- | --- | --- | --- | --- | --- |
| **Demographic** | **Laboratory tests** | **Others** | **Forward inclusion** | **backward elimination** | **CL** | **Vc** | **Q** | **Vp** |
| Soedarsono S.  (2022)28 | Age, BW | AST, ALT, Albumin, TBIL | Food status, Diabetes mellitus status, HIV status, NAT2 phenotype, Concomitant drugs | NR | NR | BW, NAT2 phenotype | BW | NR | NR |
| Horita Y.  (2018)29 | Age, BW, Sex | eGFR | HIV status, NAT2 phenotype | P<0.1 | P<0.05 | BW, NAT2 phenotype | BW | BW, NAT2 phenotype | BW |
| Denti P.  (2022)30 | BW, PMA, FFM, Height, Sex | NR | NAT2 phenotype, HIV status, Concomitant drugs, Administration method | NR | NR | BW, NAT2 phenotype, PMA | BW | BW | BW |
| Jing W.  (2020)31 | BW, Height, Sex | CrCL, BUN, ALP, ALT, AST | NAT2 phenotype | P<0.05 | P<0.01 | BW, NAT2 phenotype | NR | NR | NR |
| Panjasawatwong N.  (2020)32 | BW, PMA, Sex | Renal and Liver function | NAT2 phenotype, Disease severity, Type TB, Smoking status, Alcoholism status, Diabetes mellitus status, Arterial hypertension status, Concomitant drugs | P<0.05 | P<0.01 | BW, NAT2 phenotype, PMA | BW | BW | BW |
| Chen B.  (2022)33 | Age, BW, Sex | CrCL, ASP, AST, BUN, TBIL | NAT2 phenotype | P<0.01 | P<0.001 | NAT2 phenotype | NR | NR | NR |
| Huerta-García AP. (2020)34 | Age, Sex, BW, BMI | NR | NAT2 phenotype, Type TB, Smoking Status, Alcoholism status, Diabetes mellitus status, Arterial hypertension status, Concomitant drugs | P<0.05 | P<0.01 | NAT2 phenotype | BMI | NR | NR |
| Abdelwahab MT.  (2020)35 | Pregnancy status, Age, BW, FFM | NR | NAT2 phenotype, Concomitant drugs | P<0.05 | NR | BW, NAT2 phenotype | BW | BW | BW |
| Wilkins JJ.  (2011)13 | Age, BW, Sex, Ethnicity, BMI | NR | NAT2 phenotype, HIV status, Concomitant drugs | P<0.05 | P<0.001 | BW, NAT2 phenotype, HIV status | BW, Sex | BW | BW |
| McCallum A. D. (2021)36 | Age, BW, BMI, Sex | CrCL | HIV status, Concomitant drugs, Adherence | P<0.05 | P<0.01 | BW | NR | NR | NR |
| Gao Y. (2021)37 | Age, Sex, Height, BW, BMI | CRP, FBG, BUN, UA, CREA, liver function (TBIL, ALT, AST, ALP, ALB) | Diabetes mellitus status, Smoking status, Alcohol consumption, drug formulation, NAT2 phenotype | P<0.05 | P>0.01 | BW, NAT2 phenotype | NA | NA | NA |
| Sundell J. (2020)38 | Age, BW, Sex | CREA, ALT, AST, CD4+ count | NAT2 phenotype, Concomitant drugs, CYP1A2, CYP2A6, CYP2B6, CYP3A4, CYP3A5 | P<0.05 | P>0.001 | BW, NAT2 phenotype | BW | BW | BW |
| Cho Y. S. (2021)39 | Age, BW, Height, Sex, FFM | ALB, TBIL | Food status, Diabetes mellitus status, Administration method, NAT2 phenotype | P<0.01 | P>0.005 | FFM | FFM | NA | NA |
| Naidoo A. (2019)40 | Age, Sex, BW, FFM, BMI, Ethnicity | CD4+ count | HIV status, NAT2 phenotype, Concomitant drugs | P<0.05 | NR | FFM | FFM | FFM | FFM |

Abbreviations: CL: apparent clearance (L/h); Q: the interconpartment clearance; Vc: the apparent central compartment distribution volumes (L); Vp: the apparent peripheral compartment distribution volumes (L); TBIL: total bilirubin, ALT: Alanine aminotransferase, AST: aspartate aminotransferase, eGFR: glomerular filtration rate, ALP: alkaline phosphatase, BUN: urea nitrogen, CrCL: creatinine clearance, CRP: C-reactive protein, CD4+ count: T-cell count, UA: uric acid, BMI: body mass index, BW: body weight, FFM: fat-free mass, FBG: fasting blood glucose, PMA: postmenstrual age, NAT2: N-acetyltransferase 2, CYP:Cytochrome P450 , NR: not report, NA: Not available.

Supplementary Material 1: R Codes of Isoniazid PopPK Model Repository

# Aim: Establish a model repository of parametric popPK models for Isoniazid using RxODE

# Author: Gehang Ju

# Email: 218101055@csu.edu.cn

# Tips: Change parameters of vitrual patients to simulate

# Reference Packages:

##RxODE: https://nlmixrdevelopment.github.io/RxODE/

#setwd and library R packages------------

rm(list=ls())

#set working directory to current folder

curr.dir<-dirname(rstudioapi::getActiveDocumentContext()$path)

setwd(curr.dir)

# load R packages

library(tidyverse) # for data visualisation and manipulation

library(RxODE) # for simulation

library(cowplot) # for combine figures

library(ggplot2)

library(ggpubr)

library(dplyr)

#create fold for figure output

output_dir <- "simPK"

if (!file.exists(output_dir)) {dir.create (output_dir)}

# 1.##Soedarsono S. (2022)##---------------

# Define model-----------------

# CL   = 17.7 × (1+NAT2)*(BW/50)^0.75 (L/h)

# V    = 40.5 (L)*(BW/50)

# Ka   = 0.25 (h-1)

# BSV (CV%): CL = 82.5%

# add.err = 0.174 mg/L

# NAT2: SA(0), IA(1.14), RA(2.16)

# Typical patient1: NAT2_SA

# Typical patient2: NAT2_IA

# Typical patient3: NAT2_RA

# Dose: oral 300

# Body weight: 60kg

set.seed(83001)

rxSetSeed(83001)

mod1 <- RxODE({

  CL = TVCL * exp(eta.CL)

  V  = TVV

  KA = TVKA

  C1 = centr/V

  d/dt(depot) = -KA * depot

  d/dt(centr) =  KA * depot - CL * C1

  cp = C1 + add.err.sd

})

# Note: prop.err model:

# cp = C2 * (1+prop.err.sd)

# combined error model: prop + add

# cp = C2 * (1+prop.err.sd) + add.err

# exponential error model:

# cp = C2 * exp(expo.err.sd)

# add.err.sd model:

# cp = C2 + add.err.sd

#NAT2_SA_300mg-----------------------

#Define typical patient: NAT2_SA

NAT2 <- 0  # 0~SA

BW   <- 60 #kg

#Define fixed effect parameters

theta <- c (

  TVCL = 17.7 * (1+NAT2) * (BW/50)^0.75,

  TVV  = 40.5 * (BW/50),

  TVKA = 0.25 )

#Define between subject variability

omega <- lotri(eta.CL ~ 0.825^2)

#Define unexplained variability

sigma <- lotri(add.err.sd ~ 0.174)

#Dose of Oral input qd--------------------

dose_300_qd <- 300 #300mg/d

#Define event record

ev1 <- et(amount.units = "mg", time.units = "hours") %>%

  add.dosing(dosing.to = "depot",

             dose      = dose_300_qd,

             nbr.doses = 28,

             dosing.interval = 24,

             start.time = 0) %>%

  #0-24h after the last dose

  add.sampling(seq(from = 648, to = 672, by = 0.2))

#Perform simulation

#Total number of subject: 1000

sim1 <- rxSolve(mod1, theta, ev1, omega=omega, sigma=sigma, nSub=1000)

#Concerntration

pksa_300qd <- sim1 %>%

  group_by(time) %>%

  # 10-90% Prediction interval

  summarise(medconc = median(cp),

            lowconc = quantile(cp,0.1),

            highconc = quantile(cp, 0.9)) %>%

  ungroup() %>%

  # time after last dose

  mutate(tald = time-648)

#make the margin smooth by lowess

l0.1 <- lowess(pksa_300qd$tald, pksa_300qd$lowconc, f=0.11)

l0.5 <- lowess(pksa_300qd$tald, pksa_300qd$medconc, f=0.11)

l0.9 <- lowess(pksa_300qd$tald, pksa_300qd$highconc, f=0.11)

df0.1 <- data.frame(tald=l0.1$x, lowconc=l0.1$y)

df0.5 <- data.frame(tald=l0.5$x, medconc=l0.5$y)

df0.9 <- data.frame(tald=l0.9$x, highconc=l0.9$y)

qdsa300_dat <- df0.1 %>%

  left_join(df0.5,by="tald") %>%

  left_join(df0.9,by="tald") %>%

  mutate(lowconc=case_when(lowconc<=0~0,TRUE~as.numeric(lowconc)))

dat1 <- qdsa300_dat %>%

  mutate(

    Study = "Soedarsono S. (2022)",

    drug  = "Isoniazid",

    pop   = "NAT2_SA")

#---------------output-----------------####

#y_breaks <- c()

label_name <- c("Soedarsono S. (2022)")

# concentration

pl1 <- qdsa300_dat %>%

  ggplot(mapping=aes(x=tald, y=medconc)) +

  geom_line(linewidth=1.0, color="#4A6990FF") +

  geom_ribbon(aes(x=tald,ymin=lowconc,ymax=highconc), fill = "#7AA6DCFF",alpha=0.2) +

  theme_bw(base_size = 30) +

  labs(title = "Study1. SA 300mg")+

  scale_x_continuous("Time (h)", limits = c(-0.01,24.1), breaks = c(0,4,8,12,16,20,24)) +

  scale_y_continuous("Concentration (mg/L)",limits = c(-0.01,10.5), breaks = c(0,2.5,5,7.5,10)) +

  theme (legend.position = "none",

         plot.background = element_blank(),

         panel.grid.minor = element_blank(),

         panel.grid.major = element_blank())

jpeg(filename = paste0(output_dir,"/1.Soedarsono2022_SA300.jpg"),

     width=5000, height=4500, res=300)

print(pl1)

dev.off()

#NAT2_IA_300mg------------------------------------

#Define typical patient: NAT2_IA

NAT2 <- 1.14 # 0~IA

#Define fixed effect parameters

theta <- c (

  TVCL = 17.7 * (1+NAT2) * (BW/50)^0.75,

  TVV  = 40.5 * (BW/50),

  TVKA = 0.25 )

#Perform simulation

#Total number of subject: 1000

sim2 <- rxSolve(mod1, theta, ev1, omega=omega, sigma=sigma, nSub=1000)

#Concerntration

pkia_300qd <- sim2 %>%

  group_by(time) %>%

  # 10-90% Prediction interval

  summarise(medconc = median(cp),

            lowconc = quantile(cp,0.1),

            highconc = quantile(cp, 0.9)) %>%

  ungroup() %>%

  # time after last dose

  mutate(tald = time-648)

#make the margin smooth by lowess

l0.1 <- lowess(pkia_300qd$tald, pkia_300qd$lowconc, f=0.11)

l0.5 <- lowess(pkia_300qd$tald, pkia_300qd$medconc, f=0.11)

l0.9 <- lowess(pkia_300qd$tald, pkia_300qd$highconc, f=0.11)

df0.1 <- data.frame(tald=l0.1$x, lowconc=l0.1$y)

df0.5 <- data.frame(tald=l0.5$x, medconc=l0.5$y)

df0.9 <- data.frame(tald=l0.9$x, highconc=l0.9$y)

qdia300_dat <- df0.1 %>%

  left_join(df0.5,by="tald") %>%

  left_join(df0.9,by="tald") %>%

  mutate(lowconc=case_when(lowconc<=0~0,TRUE~as.numeric(lowconc)))

dat2 <- qdia300_dat %>%

  mutate(

    Study = "Soedarsono S. (2022)",

    drug  = "Isoniazid",

    pop   = "NAT2_IA"  )

#---------------output-----------------####

#y_breaks <- c()

label_name <- c("Soedarsono S. (2022)")

# concentration

pl2 <- qdia300_dat %>%

  ggplot(mapping=aes(x=tald, y=medconc)) +

  geom_line(size=1.0, color="#4A6990FF") +

  geom_ribbon(aes(x=tald,ymin=lowconc,ymax=highconc), fill = "#7AA6DCFF",alpha=0.2) +

  theme_bw(base_size = 30) +

  labs(title = "Study1. IA 300mg")+

  scale_x_continuous("Time (h)", limits = c(-0.1,24.1), breaks = c(0,4,8,12,16,20,24)) +

  scale_y_continuous("Concentration (mg/L)",limits = c(-0.1,10.5), breaks = c(0,2.5,5,7.5,10)) +

  theme (legend.position = "none",

         plot.background = element_blank(),

         panel.grid.minor = element_blank(),

         panel.grid.major = element_blank())

jpeg(filename = paste0(output_dir,"/1.Soedarsono2022_IA300.jpg"),

     width=5000, height=4500, res=300)

print(pl2)

dev.off()

#NAT2_RA_300mg------------------------------------

#Define typical patient: NAT2_IA

NAT2 <- 2.16 # 0~IA

#Define fixed effect parameters

theta <- c (

  TVCL = 17.7 * (1+NAT2) * (BW/50)^0.75,

  TVV  = 40.5 * (BW/50),

  TVKA = 0.25 )

#Perform simulation

#Total number of subject: 1000

sim3 <- rxSolve(mod1, theta, ev1, omega=omega, sigma=sigma, nSub=1000)

#Concerntration

pkra_300qd <- sim3 %>%

  group_by(time) %>%

  # 10-90% Prediction interval

  summarise(medconc = median(cp),

            lowconc = quantile(cp,0.1),

            highconc = quantile(cp, 0.9)) %>%

  ungroup() %>%

  # time after last dose

  mutate(tald = time-648)

#make the margin smooth by lowess

l0.1 <- lowess(pkra_300qd$tald, pkra_300qd$lowconc, f=0.11)

l0.5 <- lowess(pkra_300qd$tald, pkra_300qd$medconc, f=0.11)

l0.9 <- lowess(pkra_300qd$tald, pkra_300qd$highconc, f=0.11)

df0.1 <- data.frame(tald=l0.1$x, lowconc=l0.1$y)

df0.5 <- data.frame(tald=l0.5$x, medconc=l0.5$y)

df0.9 <- data.frame(tald=l0.9$x, highconc=l0.9$y)

qdra300_dat <- df0.1 %>%

  left_join(df0.5,by="tald") %>%

  left_join(df0.9,by="tald") %>%

  mutate(lowconc=case_when(lowconc<=0~0,TRUE~as.numeric(lowconc)))

dat3 <- qdra300_dat %>%

  mutate(

    Study = "Soedarsono S. (2022)",

    drug  = "Isoniazid",

    pop   = "NAT2_RA" )

#---------------output-----------------####

#y_breaks <- c()

label_name <- c("Soedarsono S. (2022)")

# concentration

pl3 <- qdra300_dat %>%

  ggplot(mapping=aes(x=tald, y=medconc)) +

  geom_line(size=1.0, color="#4A6990FF") +

  geom_ribbon(aes(x=tald,ymin=lowconc,ymax=highconc), fill = "#7AA6DCFF",alpha=0.2) +

  theme_bw(base_size = 30) +

  labs(title = "Study1. RA 300mg")+

  scale_x_continuous("Time (h)", limits = c(-0.1,24.1), breaks = c(0,4,8,12,16,20,24)) +

  scale_y_continuous("Concentration (mg/L)",limits = c(-0.1,10.5), breaks = c(0,2.5,5,7.5,10)) +

  theme (legend.position = "none",

         plot.background = element_blank(),

         panel.grid.minor = element_blank(),

         panel.grid.major = element_blank())

jpeg(filename = paste0(output_dir,"/1.Soedarsono2022_RA300.jpg"),

     width=5000, height=4500, res=300)

print(pl3)

dev.off()

# 2.##Horita Y. (2018)##Children#----------

# Define model ----------------

# CL   = 8.08 * (BW/14.3) ^ 0.75 (L/h) ; for NAT2_RA & IA

# CL   = 4.44 * (BW/14.3) ^ 0.75 (L/h) ; for NAT2_SA

# V2   = 16.6 * (BW/14.3) ^ 1.0 (L)

# Q    = 8.46 * (BW/14.3) ^ 0.75(L/h)

# V3   = 1.07 * (BW/14.3) ^ 1.0 (L)

# Ka   = 4.23 (h-1)

# BSV (CV%): CL = 48.0% ; for NAT2_RA & IA (CLnon_slow)

# BSV (CV%): CL = 32.4% ; for NAT2_SA (CLslow)

# BSV (CV%): V2 = 24.1%

# BSV (CV%): Q  = 63.7%

# BSV (CV%): V3 = 190%

# BSV (CV%): KA = 56.7%

# add.err.sd    = 0.134 mg/L

# prop.err.sd   = 29.2%

# Typical patient1: CLslow & 150mg & 14kg

# Typical patient3: CLnon_slow & 150mg & 14kg

# Dose: oral 300, 600mg

set.seed(90101)

rxSetSeed(90101)

mod2 <- RxODE({

  CL = TVCL * exp(eta.CL);

  V2 = TVV2 * exp(eta.V2);

  Q  = TVQ  * exp(eta.Q );

  V3 = TVV3 * exp(eta.V3);

  KA = TVKA * exp(eta.KA);

  C2 = centr/V2;

  C3 = peri/V3 ;

  d/dt(depot) = -KA * depot;

  d/dt(centr) =  KA * depot - CL * C2 + Q * (C3 - C2);

  d/dt(peri)  = Q * C2 - Q * C3;

  cp = C2 * (1+prop.err.sd) + add.err.sd

})

#CLslow & 150mg & 14kg----------

BW <- 14 #kg

#Define fixed effect parameters

theta <- c(TVCL=4.44 * (BW/14.3)^0.75,

           TVV2=16.6 * (BW/14.3),

           TVQ =8.46 * (BW/14.3)^0.75,

           TVV3=1.07 * (BW/14.3),

           TVKA=4.23)

# Define between subject variability

omega <- lotri(eta.CL ~ 0.324^2,

               eta.V2 ~ 0.241^2,

               eta.Q  ~ 0.637^2,

               eta.V3 ~ 1.90 ^2,

               eta.KA ~ 0.567^2)

#Define unexplained variability

sigma <- lotri(add.err.sd  ~ 0.0393,

               prop.err.sd ~ 0.193)

#Dose of Oral input qd--------------------

dose_150_qd <- 150 #150mg/d

#Define event record

ev2 <- et(amount.units = "mg", time.units = "hours") %>%

  add.dosing(dosing.to = "depot",

             dose      = dose_150_qd,

             nbr.doses = 28,

             dosing.interval = 24,

             start.time = 0) %>%

  #0-24h after the last dose

  add.sampling(seq(from = 648, to = 672, by = 0.05))

#Perform simulation

#Total number of subject: 1000

sim4 <- rxSolve(mod2, theta, ev2, omega=omega, sigma=sigma, nSub=1000)

#Concerntration

pkslow_14qd <- sim4 %>%

  group_by(time) %>%

  # 10-90% Prediction interval

  summarise(medconc = median(cp),

            lowconc = quantile(cp,0.1),

            highconc = quantile(cp, 0.9)) %>%

  ungroup() %>%

  # time after last dose

  mutate(tald = time-648)

#make the margin smooth by lowess

l0.1 <- lowess(pkslow_14qd$tald, pkslow_14qd$lowconc, f=0.025)

l0.5 <- lowess(pkslow_14qd$tald, pkslow_14qd$medconc, f=0.025)

l0.9 <- lowess(pkslow_14qd$tald, pkslow_14qd$highconc, f=0.025)

df0.1 <- data.frame(tald=l0.1$x, lowconc=l0.1$y)

df0.5 <- data.frame(tald=l0.5$x, medconc=l0.5$y)

df0.9 <- data.frame(tald=l0.9$x, highconc=l0.9$y)

qds150_dat <- df0.1 %>%

  left_join(df0.5,by="tald") %>%

  left_join(df0.9,by="tald") %>%

  mutate(lowconc=case_when(lowconc<=0~0,TRUE~as.numeric(lowconc)))

dat4 <- qds150_dat %>%

  mutate(

    Study = "Horita Y. (2018)",

    drug  = "Isoniazid",

    pop   = "NAT2_slow"

  )

#---------------output-----------------####

#y_breaks <- c()

label_name <- c("Horita Y. (2018)")

# concentration

pl4 <- qds150_dat %>%

  ggplot(mapping=aes(x=tald, y=medconc)) +

  geom_line(size=1.0, color="#4A6990FF") +

  geom_ribbon(aes(x=tald,ymin=lowconc,ymax=highconc), fill = "#7AA6DCFF",alpha=0.2) +

  theme_bw(base_size = 30) +

  labs(title = "Study2. SA 150mg 14kg")+

  scale_x_continuous("Time (h)", limits = c(-0.1,24.1), breaks = c(0,4,8,12,16,20,24)) +

  scale_y_continuous("Concentration (mg/L)",limits = c(-0.1,12), breaks = c(0,2.5,5,7.5,10)) +

  theme (legend.position = "none",

         plot.background = element_blank(),

         panel.grid.minor = element_blank(),

         panel.grid.major = element_blank())

jpeg(filename = paste0(output_dir,"/2.Horita2018_SA150mg.jpg"),

     width=5000, height=4500, res=300)

print(pl4)

dev.off()

#CLnon_slow & 150mg & 14kg----------

BW <- 14 #kg

#Define fixed effect parameters

theta <- c(TVCL=8.08 * (BW/14.3)^0.75,

           TVV2=16.6 * (BW/14.3),

           TVQ =8.46 * (BW/14.3)^0.75,

           TVV3=1.07 * (BW/14.3),

           TVKA=4.23)

# Define between subject variability

omega <- lotri(eta.CL ~ 0.48 ^2,

               eta.V2 ~ 0.241^2,

               eta.Q  ~ 0.637^2,

               eta.V3 ~ 1.90 ^2,

               eta.KA ~ 0.567^2)

#Define unexplained variability

sigma <- lotri(add.err.sd  ~ 0.0393,

               prop.err.sd ~ 0.193)

#Perform simulation

#Total number of subject: 1000

sim5 <- rxSolve(mod2, theta, ev2, omega=omega, sigma=sigma, nSub=1000)

#Concerntration

pknonslow_14qd <- sim5 %>%

  group_by(time) %>%

  # 10-90% Prediction interval

  summarise(medconc = median(cp),

            lowconc = quantile(cp,0.1),

            highconc = quantile(cp, 0.9)) %>%

  ungroup() %>%

  # time after last dose

  mutate(tald = time-648)

#make the margin smooth by lowess

l0.1 <- lowess(pknonslow_14qd$tald, pknonslow_14qd$lowconc, f=0.02)

l0.5 <- lowess(pknonslow_14qd$tald, pknonslow_14qd$medconc, f=0.02)

l0.9 <- lowess(pknonslow_14qd$tald, pknonslow_14qd$highconc, f=0.02)

df0.1 <- data.frame(tald=l0.1$x, lowconc=l0.1$y)

df0.5 <- data.frame(tald=l0.5$x, medconc=l0.5$y)

df0.9 <- data.frame(tald=l0.9$x, highconc=l0.9$y)

qdns150_dat <- df0.1 %>%

  left_join(df0.5,by="tald") %>%

  left_join(df0.9,by="tald") %>%

  mutate(lowconc=case_when(lowconc<=0~0,TRUE~as.numeric(lowconc)))

dat5 <- qdns150_dat %>%

  mutate(

    Study = "Horita Y. (2018)",

    drug  = "Isoniazid",

    pop   = "NAT2_nonslow"

  )

#---------------output-----------------####

#y_breaks <- c()

label_name <- c("Horita Y. (2018)")

# concentration

pl5 <- qdns150_dat %>%

  ggplot(mapping=aes(x=tald, y=medconc)) +

  geom_line(size=1.0, color="#4A6990FF") +

  geom_ribbon(aes(x=tald,ymin=lowconc,ymax=highconc), fill = "#7AA6DCFF",alpha=0.2) +

  theme_bw(base_size = 30) +

  labs(title = "Study2. nonSA 150mg 14kg")+

  scale_x_continuous("Time (h)", limits = c(-0.1,24.1), breaks = c(0,4,8,12,16,20,24)) +

  scale_y_continuous("Concentration (mg/L)",limits = c(-0.1,12), breaks = c(0,2.5,5,7.5,10)) +

  theme (legend.position = "none",

         plot.background = element_blank(),

         panel.grid.minor = element_blank(),

         panel.grid.major = element_blank())

jpeg(filename = paste0(output_dir,"/2.Horita2018_ns150mg.jpg"),

     width=5000, height=4500, res=300)

print(pl5)

dev.off()

# 3.## Denti P. (2021)## Children# -----------------

# Define model ----------

# CL        = 3.0 * (1 + NAT2) * (BW/Mean)^0.75 * PMA^gama /(PMA^gama + PMA50^gama) (L/h)

# PMA50     = 0.829 (years)

# gamma     = 3.35

# V2        = 10.5 * (BW/Mean)^1  (L)

# Q         = 0.364 * (BW/Mean)^0.75 (L/h)

# V3        = 3.04 * (BW/Mean)^1 (L)

# F         = 1                                        WHEN AGE >= AGEfull_F

# F         = Fbirth + (1 - Fbirth) * AGE / AGEfull_F  WHEN AGE <  AGEfull_F

# Fbirth    = 0.74

# AGEfull_F = 1.63

# Ka        = 2.83 (h-1)

# Tlag      = 0.123 (h)

# BSV (CV%):  CL   = 30.8%

# BOV (CV%):  F    = 31.1%

# BOV (CV%):  Tlag = 132 %

# BOV (CV%):  KA   = 48.7%

# add.err.sd    = 0.061 mg/L

# prop.err.sd   = 8.19  %

# NAT2: SA(0), IA(0.55), RA(0.967)

# Typical patient1: NAT2_SA 2years(PMA~2.75)

# Typical patient2: NAT2_IA 2years(PMA~2.75)

# Typical patient3: NAT2_RA 2years(PMA~2.75)

# Dose: oral 150mg qd

set.seed(90201)

rxSetSeed(90201)

mod3 <- RxODE({

  CL        = TVCL * exp(eta.CL);

  PMA50     = TVPMA50;

  gamma     = TVgamma;

  V2        = TVV2;

  Q         = TVQ

  V3        = TVV3;

  KA        = TVKA * exp(iov.KA);

  F1        = TVF1 * exp(iov.F1);

  Fbirth    = TVFbirth;

  AGEfull_F = TVAGEfull_F;

  ## Added modeled F, DUR and Rate

  alagDepot = TVTLAG * exp(iov.TLAG);

  C2          = centr/V2;

  C3          = peri/V3 ;

  d/dt(depot) = -KA * depot;

  alag(depot) = alagDepot

  d/dt(centr) = F1 * KA * depot - CL * C2 + Q * (C3 - C2);

  d/dt(peri)  = Q * C2 - Q * C3;

  cp = C2 * (1+prop.err.sd) + add.err.sd

})

#NAT2_SA 14kg & 150mg----------

NAT2 <- 0   ; #RA=0

AGE  <- 2.0 ; #AGE = 2yrs

PMA  <- 2.75; #PMA = gestational age (39weeks~0.75year) + chronological age

BW   <- 14

#Define fixed effect parameters

theta <- c(TVCL        = 3.0 * (1 + NAT2) * (BW/9)^0.75 * PMA^3.35 / (PMA^3.35+0.829^3.35),

           TVPMA50     = 0.829,

           TVgamma     = 3.35,

           TVV2        = 16.5 * (BW/9)^1,

           TVQ         = 18.4 * (BW/9)^0.75,

           TVV3        = 36.8 * (BW/9)^1,

           TVF1        = 1, #Define as children’s age

           #TVF1        = 0.74 + (1 - 0.74) * AGE / 1.63,

           TVFbirth    = 0.74,

           TVAGEfull_F = 1.63,

           TVKA        = 1.21,

           TVTLAG      = 0.02,

           TVDUR       = 0.47)

# Define between subject variability

omega <- lotri(eta.CL   ~ 0.308^2,

               iov.KA   ~ 0.487^2,

               iov.F1   ~ 0.311^2,

               iov.TLAG ~ 1.32 ^2)

#Define unexplained variability

sigma <- lotri(add.err.sd  ~ 0.0610,

               prop.err.sd ~ 0.0819)

#Dose of Oral input qd--------------------

dose_150_qd <- 150 #150mg/d

#Define event record

ev3 <- et(amount.units = "mg", time.units = "hours") %>%

  add.dosing(dosing.to = "depot",

             dose      = dose_150_qd,

             nbr.doses = 28,

             dosing.interval = 24,

             start.time = 0) %>%

  #0-24h after the last dose

  add.sampling(seq(from = 648, to = 672, by = 0.1))

#Perform simulation

#Total number of subject: 1000

sim6 <- rxSolve(mod3, theta, ev3, omega=omega, sigma=sigma, nSub=1000)

#Concerntration

pkSA_qd <- sim6 %>%

  group_by(time) %>%

  # 10-90% Prediction interval

  summarise(medconc = median(cp),

            lowconc = quantile(cp,0.1),

            highconc = quantile(cp, 0.9)) %>%

  ungroup() %>%

  # time after last dose

  mutate(tald = time-648)

#make the margin smooth by lowess

l0.1 <- lowess(pkSA_qd$tald, pkSA_qd$lowconc, f=0.02)

l0.5 <- lowess(pkSA_qd$tald, pkSA_qd$medconc, f=0.02)

l0.9 <- lowess(pkSA_qd$tald, pkSA_qd$highconc, f=0.02)

df0.1 <- data.frame(tald=l0.1$x, lowconc=l0.1$y)

df0.5 <- data.frame(tald=l0.5$x, medconc=l0.5$y)

df0.9 <- data.frame(tald=l0.9$x, highconc=l0.9$y)

pkSA_dat <- df0.1 %>%

  left_join(df0.5,by="tald") %>%

  left_join(df0.9,by="tald") %>%

  mutate(lowconc=case_when(lowconc<=0~0,TRUE~as.numeric(lowconc)))

dat6 <- pkSA_dat %>%

  mutate(

    Study = "Denti P. (2021)",

    drug  = "Isoniazid",

    pop   = "NAT2_SA"

  )

#---------------output-----------------####

#y_breaks <- c()

label_name <- c("Denti P. (2021)")

# concentration

pl6 <- pkSA_dat %>%

  ggplot(mapping=aes(x=tald, y=medconc)) +

  geom_line(size=1.0, color="#4A6990FF") +

  geom_ribbon(aes(x=tald,ymin=lowconc,ymax=highconc), fill = "#7AA6DCFF",alpha=0.2) +

  theme_bw(base_size = 30) +

  labs(title = "Study3. SA 150mg 14kg")+

  scale_x_continuous("Time (h)", limits = c(-0.1,24.1), breaks = c(0,4,8,12,16,20,24)) +

  scale_y_continuous("Concentration (mg/L)",limits = c(-0.1,10.5), breaks = c(0,2.5,5,7.5,10)) +

  theme (legend.position = "none",

         plot.background = element_blank(),

         panel.grid.minor = element_blank(),

         panel.grid.major = element_blank())

jpeg(filename = paste0(output_dir,"/3.Denti2021_SA150mg.jpg"),

     width=5000, height=4500, res=300)

print(pl6)

dev.off()

#NAT2_IA 14kg & 150mg----------

NAT2 <- 0.55   ; #IA=0.55

AGE  <- 2.0 ; #AGE = 2yrs

PMA  <- 2.75; #PMA = gestational age (39weeks~0.75year) + chronological age

BW   <- 14

#Define fixed effect parameters

theta <- c(TVCL        = 3.0 * (1 + NAT2) * (BW/10.9)^0.75 * PMA^3.35 / (PMA^3.35+0.829^3.35),

           TVPMA50     = 0.829,

           TVgamma     = 3.35,

           TVV2        = 16.5 * (BW/9)^1,

           TVQ         = 18.4 * (BW/9)^0.75,

           TVV3        = 36.8 * (BW/9)^1,

           TVF1        = 1,

           #TVF1        = 0.74 + (1 - 0.74) * AGE / 1.63,

           TVFbirth    = 0.74,

           TVAGEfull_F = 1.63,

           TVKA        = 1.21,

           TVTLAG      = 0.02,

           TVDUR       = 0.47)

#Perform simulation

#Total number of subject: 1000

sim7 <- rxSolve(mod3, theta, ev3, omega=omega, sigma=sigma, nSub=1000)

#Concerntration

pkIA_qd <- sim7 %>%

  group_by(time) %>%

  # 10-90% Prediction interval

  summarise(medconc = median(cp),

            lowconc = quantile(cp,0.1),

            highconc = quantile(cp, 0.9)) %>%

  ungroup() %>%

  # time after last dose

  mutate(tald = time-648)

#make the margin smooth by lowess

l0.1 <- lowess(pkIA_qd$tald, pkIA_qd$lowconc, f=0.02)

l0.5 <- lowess(pkIA_qd$tald, pkIA_qd$medconc, f=0.02)

l0.9 <- lowess(pkIA_qd$tald, pkIA_qd$highconc, f=0.02)

df0.1 <- data.frame(tald=l0.1$x, lowconc=l0.1$y)

df0.5 <- data.frame(tald=l0.5$x, medconc=l0.5$y)

df0.9 <- data.frame(tald=l0.9$x, highconc=l0.9$y)

pkIA_dat <- df0.1 %>%

  left_join(df0.5,by="tald") %>%

  left_join(df0.9,by="tald") %>%

  mutate(lowconc=case_when(lowconc<=0~0,TRUE~as.numeric(lowconc)))

dat7 <- pkIA_dat %>%

  mutate(

    Study = "Denti P. (2021)",

    drug  = "Isoniazid",

    pop   = "NAT2_IA"

  )

#---------------output-----------------####

#y_breaks <- c()

label_name <- c("Denti P. (2021)")

# concentration

pl7 <- pkIA_dat %>%

  ggplot(mapping=aes(x=tald, y=medconc)) +

  geom_line(size=1.0, color="#4A6990FF") +

  geom_ribbon(aes(x=tald,ymin=lowconc,ymax=highconc), fill = "#7AA6DCFF",alpha=0.2) +

  theme_bw(base_size = 30) +

  labs(title = "Study3. IA 150mg 14kg")+

  scale_x_continuous("Time (h)", limits = c(-0.1,24.1), breaks = c(0,4,8,12,16,20,24)) +

  scale_y_continuous("Concentration (mg/L)",limits = c(-0.1,10.5), breaks = c(0,2.5,5,7.5,10)) +

  theme (legend.position = "none",

         plot.background = element_blank(),

         panel.grid.minor = element_blank(),

         panel.grid.major = element_blank())

jpeg(filename = paste0(output_dir,"/3.Denti2021_IA150mg.jpg"),

     width=5000, height=4500, res=300)

print(pl7)

dev.off()

#NAT2_RA 14kg & 150mg----------

NAT2 <- 0.967   ; #RA=0.967

AGE  <- 2.0 ; #AGE = 2yrs

PMA  <- 2.75; #PMA = gestational age (39weeks~0.75year) + chronological age

BW   <- 14

#Define fixed effect parameters

theta <- c(TVCL        = 3.0 * (1 + NAT2) * (BW/10.9)^0.75 * PMA^3.35 / (PMA^3.35+0.829^3.35),

           TVPMA50     = 0.829,

           TVgamma     = 3.35,

           TVV2        = 16.5 * (BW/9)^1,

           TVQ         = 18.4 * (BW/9)^0.75,

           TVV3        = 36.8 * (BW/9)^1,

           TVF1        = 1,

           #TVF1        = 0.74 + (1 - 0.74) * AGE / 1.63,

           TVFbirth    = 0.74,

           TVAGEfull_F = 1.63,

           TVKA        = 1.21,

           TVTLAG      = 0.02,

           TVDUR       = 0.47)

#Perform simulation

#Total number of subject: 1000

sim8 <- rxSolve(mod3, theta, ev3, omega=omega, sigma=sigma, nSub=1000)

#Concerntration

pkRA_qd <- sim8 %>%

  group_by(time) %>%

  # 10-90% Prediction interval

  summarise(medconc = median(cp),

            lowconc = quantile(cp,0.1),

            highconc = quantile(cp, 0.9)) %>%

  ungroup() %>%

  # time after last dose

  mutate(tald = time-648)

#make the margin smooth by lowess

l0.1 <- lowess(pkRA_qd$tald, pkRA_qd$lowconc, f=0.02)

l0.5 <- lowess(pkRA_qd$tald, pkRA_qd$medconc, f=0.02)

l0.9 <- lowess(pkRA_qd$tald, pkRA_qd$highconc, f=0.02)

df0.1 <- data.frame(tald=l0.1$x, lowconc=l0.1$y)

df0.5 <- data.frame(tald=l0.5$x, medconc=l0.5$y)

df0.9 <- data.frame(tald=l0.9$x, highconc=l0.9$y)

pkRA_dat <- df0.1 %>%

  left_join(df0.5,by="tald") %>%

  left_join(df0.9,by="tald") %>%

  mutate(lowconc=case_when(lowconc<=0~0,TRUE~as.numeric(lowconc)))

dat8 <- pkRA_dat %>%

  mutate(

    Study = "Denti P. (2021)",

    drug  = "Isoniazid",

    pop   = "NAT2_RA"

  )

#---------------output-----------------####

#y_breaks <- c()

label_name <- c("Denti P. (2021)")

# concentration

pl8 <- pkRA_dat %>%

  ggplot(mapping=aes(x=tald, y=medconc)) +

  geom_line(size=1.0, color="#4A6990FF") +

  geom_ribbon(aes(x=tald,ymin=lowconc,ymax=highconc), fill = "#7AA6DCFF",alpha=0.2) +

  theme_bw(base_size = 30) +

  labs(title = "Study3. RA 150mg 14kg")+

  scale_x_continuous("Time (h)", limits = c(-0.1,24.1), breaks = c(0,4,8,12,16,20,24)) +

  scale_y_continuous("Concentration (mg/L)",limits = c(-0.1,10.5), breaks = c(0,2.5,5,7.5,10)) +

  theme (legend.position = "none",

         plot.background = element_blank(),

         panel.grid.minor = element_blank(),

         panel.grid.major = element_blank())

jpeg(filename = paste0(output_dir,"/3.Denti2021_RA150mg.jpg"),

     width=5000, height=4500, res=300)

print(pl8)

dev.off()

# 4.## Jing W. (2020)## Chinese-------------

# Define model ---------------

# CL  = 31.4 * (BW/58)^0.930 * NAT2 (L/h)

# V2  = 21.1  (L)

# Q   = 43.7  (L/h)

# V3  = 27.7  (L)

# Ka  = 1.70  (h-1)

# BSV (CV%): CL = 50.60%

# BSV (CV%): Q  = 79.87%

# BSV (CV%): KA = 87.06%

# expo.err.sd   = 25.1%

# NAT2: IA(0), RA(1.36), SA(0.378)

# Typical patient1: NAT2_SA

# Typical patient2: NAT2_IA

# Typical patient3: NAT2_RA

# Dose: oral 300mg qd

# Body Weight: 70kg

set.seed(90202)

rxSetSeed(90202)

mod4 <- RxODE({

  CL        = TVCL * exp(eta.CL);

  V2        = TVV2;

  Q         = TVQ  * exp(eta.Q);

  V3        = TVV3;

  KA        = TVKA * exp(eta.KA);

  C2          = centr/V2;

  C3          = peri/V3 ;

  d/dt(depot) = -KA * depot;

  d/dt(centr) =  KA * depot - CL * C2 + Q * (C3 - C2);

  d/dt(peri)  = Q * C2 - Q * C3;

  cp = C2 * exp(expo.err.sd)

})

#NAT2IA & 300mg & 60kg----------

BW   <- 60 #kg

NAT2 <- 1

#Define fixed effect parameters

theta <- c(TVCL=31.4 * (BW/58)^0.93 * NAT2,

           TVV2=21.1,

           TVQ =43.7,

           TVV3=27.7,

           TVKA=1.70)

# Define between subject variability

omega <- lotri(eta.CL ~ 0.256^2,

               eta.Q  ~ 0.638^2,

               eta.KA ~ 0.758^2)

#Define unexplained variability

sigma <- lotri(expo.err.sd  ~ 0.251)

#Dose of Oral input qd--------------------

dose_300_qd <- 300 #150mg/d

#Define event record

ev4 <- et(amount.units = "mg", time.units = "hours") %>%

  add.dosing(dosing.to = "depot",

             dose      = dose_300_qd,

             nbr.doses = 28,

             dosing.interval = 24,

             start.time = 0) %>%

  #0-24h after the last dose

  add.sampling(seq(from = 648, to = 672, by = 0.1))

#Perform simulation

#Total number of subject: 1000

sim9 <- rxSolve(mod4, theta, ev4, omega=omega, sigma=sigma, nSub=1000)

#Concerntration

pkIA_60kg <- sim9 %>%

  group_by(time) %>%

  # 10-90% Prediction interval

  summarise(medconc = median(cp),

            lowconc = quantile(cp,0.1),

            highconc = quantile(cp, 0.9)) %>%

  ungroup() %>%

  # time after last dose

  mutate(tald = time-648)

#make the margin smooth by lowess

l0.1 <- lowess(pkIA_60kg$tald, pkIA_60kg$lowconc, f=0.02)

l0.5 <- lowess(pkIA_60kg$tald, pkIA_60kg$medconc, f=0.02)

l0.9 <- lowess(pkIA_60kg$tald, pkIA_60kg$highconc, f=0.02)

df0.1 <- data.frame(tald=l0.1$x, lowconc=l0.1$y)

df0.5 <- data.frame(tald=l0.5$x, medconc=l0.5$y)

df0.9 <- data.frame(tald=l0.9$x, highconc=l0.9$y)

pkIA_dat <- df0.1 %>%

  left_join(df0.5,by="tald") %>%

  left_join(df0.9,by="tald") %>%

  mutate(lowconc=case_when(lowconc<=0~0,TRUE~as.numeric(lowconc)))

dat9 <- pkIA_dat %>%

  mutate(

    Study = "Jing W. (2020)",

    drug  = "Isoniazid",

    pop   = "NAT2_IA"

  )

#---------------output-----------------####

#y_breaks <- c()

label_name <- c("Jing W. (2020)")

# concentration

pl9 <- pkIA_dat %>%

  ggplot(mapping=aes(x=tald, y=medconc)) +

  geom_line(size=1.0, color="#4A6990FF") +

  geom_ribbon(aes(x=tald,ymin=lowconc,ymax=highconc), fill = "#7AA6DCFF",alpha=0.2) +

  theme_bw(base_size = 30) +

  labs(title = "Study4. IA 300mg")+

  scale_x_continuous("Time (h)", limits = c(-0.1,24.1), breaks = c(0,4,8,12,16,20,24)) +

  scale_y_continuous("Concentration (mg/L)",limits = c(-0.1,10.5), breaks = c(0,2.5,5,7.5,10)) +

  theme (legend.position = "none",

         plot.background = element_blank(),

         panel.grid.minor = element_blank(),

         panel.grid.major = element_blank())

jpeg(filename = paste0(output_dir,"/4.Jing2020_IA300mg.jpg"),

     width=5000, height=4500, res=300)

print(pl9)

dev.off()

#NAT2RA & 300mg & 60kg----------

BW   <- 60   #kg

NAT2 <- 1.36 #RA=1.36

#Define fixed effect parameters

theta <- c(TVCL=31.4 * (BW/58)^0.93 * NAT2,

           TVV2=21.1,

           TVQ =43.7,

           TVV3=27.7,

           TVKA=1.70)

#Perform simulation

#Total number of subject: 1000

sim10 <- rxSolve(mod4, theta, ev4, omega=omega, sigma=sigma, nSub=1000)

#Concerntration

pkRA_60kg <- sim10 %>%

  group_by(time) %>%

  # 10-90% Prediction interval

  summarise(medconc = median(cp),

            lowconc = quantile(cp,0.1),

            highconc = quantile(cp, 0.9)) %>%

  ungroup() %>%

  # time after last dose

  mutate(tald = time-648)

#make the margin smooth by lowess

l0.1 <- lowess(pkRA_60kg$tald, pkRA_60kg$lowconc, f=0.02)

l0.5 <- lowess(pkRA_60kg$tald, pkRA_60kg$medconc, f=0.02)

l0.9 <- lowess(pkRA_60kg$tald, pkRA_60kg$highconc, f=0.02)

df0.1 <- data.frame(tald=l0.1$x, lowconc=l0.1$y)

df0.5 <- data.frame(tald=l0.5$x, medconc=l0.5$y)

df0.9 <- data.frame(tald=l0.9$x, highconc=l0.9$y)

pkRA_dat <- df0.1 %>%

  left_join(df0.5,by="tald") %>%

  left_join(df0.9,by="tald") %>%

  mutate(lowconc=case_when(lowconc<=0~0,TRUE~as.numeric(lowconc)))

dat10 <- pkRA_dat %>%

  mutate(

    Study = "Jing W. (2020)",

    drug  = "Isoniazid",

    pop   = "NAT2_RA" )

#---------------output-----------------####

#y_breaks <- c()

label_name <- c("Jing W. (2020)")

# concentration

pl10 <- pkRA_dat %>%

  ggplot(mapping=aes(x=tald, y=medconc)) +

  geom_line(size=1.0, color="#4A6990FF") +

  geom_ribbon(aes(x=tald,ymin=lowconc,ymax=highconc), fill = "#7AA6DCFF",alpha=0.2) +

  theme_bw(base_size = 30) +

  labs(title = "Study4. RA 300mg")+

  scale_x_continuous("Time (h)", limits = c(-0.1,24.1), breaks = c(0,4,8,12,16,20,24)) +

  scale_y_continuous("Concentration (mg/L)",limits = c(-0.1,10.5), breaks = c(0,2.5,5,7.5,10)) +

  theme (legend.position = "none",

         plot.background = element_blank(),

         panel.grid.minor = element_blank(),

         panel.grid.major = element_blank())

jpeg(filename = paste0(output_dir,"/4.Jing2020_RA300mg.jpg"),

     width=5000, height=4500, res=300)

print(pl10)

dev.off()

#NAT2SA & 300mg & 60kg----------

BW   <- 60    #kg

NAT2 <- 0.378 #SA=0.378

#Define fixed effect parameters

theta <- c(TVCL=31.4 * (BW/58)^0.93 * NAT2,

           TVV2=21.1,

           TVQ =43.7,

           TVV3=27.7,

           TVKA=1.70)

#Perform simulation

#Total number of subject: 1000

sim11 <- rxSolve(mod4, theta, ev4, omega=omega, sigma=sigma, nSub=1000)

#Concerntration

pkSA_60kg <- sim11 %>%

  group_by(time) %>%

  # 10-90% Prediction interval

  summarise(medconc = median(cp),

            lowconc = quantile(cp,0.1),

            highconc = quantile(cp, 0.9)) %>%

  ungroup() %>%

  # time after last dose

  mutate(tald = time-648)

#make the margin smooth by lowess

l0.1 <- lowess(pkSA_60kg$tald, pkSA_60kg$lowconc, f=0.02)

l0.5 <- lowess(pkSA_60kg$tald, pkSA_60kg$medconc, f=0.02)

l0.9 <- lowess(pkSA_60kg$tald, pkSA_60kg$highconc, f=0.02)

df0.1 <- data.frame(tald=l0.1$x, lowconc=l0.1$y)

df0.5 <- data.frame(tald=l0.5$x, medconc=l0.5$y)

df0.9 <- data.frame(tald=l0.9$x, highconc=l0.9$y)

pkSA_dat <- df0.1 %>%

  left_join(df0.5,by="tald") %>%

  left_join(df0.9,by="tald") %>%

  mutate(lowconc=case_when(lowconc<=0~0,TRUE~as.numeric(lowconc)))

dat11 <- pkSA_dat %>%

  mutate(

    Study = "Jing W. (2020)",

    drug  = "Isoniazid",

    pop   = "NAT2_SA" )

#---------------output-----------------####

#y_breaks <- c()

label_name <- c("Jing W. (2020)")

# concentration

pl11 <- pkSA_dat %>%

  ggplot(mapping=aes(x=tald, y=medconc)) +

  geom_line(size=1.0, color="#4A6990FF") +

  geom_ribbon(aes(x=tald,ymin=lowconc,ymax=highconc), fill = "#7AA6DCFF",alpha=0.2) +

  theme_bw(base_size = 30) +

  labs(title = "Study4. SA 300mg")+

  scale_x_continuous("Time (h)", limits = c(-0.1,24.1), breaks = c(0,4,8,12,16,20,24)) +

  scale_y_continuous("Concentration (mg/L)",limits = c(-0.1,10.5), breaks = c(0,2.5,5,7.5,10)) +

  theme (legend.position = "none",

         plot.background = element_blank(),

         panel.grid.minor = element_blank(),

         panel.grid.major = element_blank())

jpeg(filename = paste0(output_dir,"/4.Jing2020_SA300mg.jpg"),

     width=5000, height=4500, res=300)

print(pl11)

dev.off()

# 5.## Panjasawatwong N. (2021)## Children-------------

# Define model --------------------

# CL    = 9.43 * (BW/10.9)^0.75 * (1-NAT2) * MAT^HILL / (MAT^HILL + MAT50^HILL) (L/h)

# F     = 1    FIX

# V2    = 3.78 * (BW/10.9)^1 (L)

# MTT   = 0.878 (h)

# KA    = KTR

# MAT50 = 12.7  (month)

# HILL  = 4.7

# Q     = 28.0 * (BW/10.9)^0.75 (L/h)

# V3    = 15.3 * (BW/10.9)^1 (L)

# slow(SA)        = 0.564

# non_slow(RA/IA) = 0

# sigma Plasma (additive error on the logarithmic scale) add.plasma: 0.474

# Ka  = 1.70  (h-1)

# BSV (CV%): CL = 36.8%

# BSV (CV%): Q  = 101 %

# Typical patient1: NAT2_slow

# Typical patient2: NAT2_nonslow

# Dose: oral 150mg qd

# Body Weight: 14kg

# MAT: 2.76 years = 33.33 month

set.seed(90401)

rxSetSeed(90401)

mod5 <- RxODE({

  CL        = TVCL * exp(eta.CL);

  V2        = TVV2;

  Q         = TVQ  * exp(eta.Q);

  V3        = TVV3;

  bio        = 1;

  mtt       = 0.878;

  n        = 2;

  ktr       = (n+1)/mtt;

  KA        = 3.417;

  C2          = centr/V2;

  C3          = peri/V3 ;

  d/dt(depot) = transit(n,mtt,bio) - KA * depot;

  d/dt(centr) = KA * depot - CL * C2 + Q * (C3 - C2);

  d/dt(peri)  = Q * C2 - Q * C3;

  cp = C2 + add.err.sd

})

#NAT2slow----------

# Typical patient1: NAT2_slow

# Dose: oral 150mg qd

# Body Weight: 14kg

# MAT: 2.76 years

BW   <- 14 #kg

NAT2 <- 0.564

MAT  <- 33.33 #monthes

#Define fixed effect parameters

theta <- c(

TVCL=9.43*(BW/10.9)^0.75*(1-NAT2)*MAT^4.7/(MAT^4.7+12.7^4.7),

           TVV2=3.78*(BW/10.9)^1,

           TVQ =28.0*(BW/10.9)^0.75,

           TVV3=15.3*(BW/10.9)^1)

# Define between subject variability

omega <- lotri(eta.CL ~ 0.368^2,

               eta.Q  ~ 1.01 ^2)

#Define unexplained variability

sigma <- lotri(add.err.sd  ~ 0.474)

#Dose of Oral input qd--------------------

dose_150_qd <- 150 #150mg/d

#Define event record

ev5 <- et(amount.units = "mg", time.units = "hours") %>%

  add.dosing(dosing.to = "depot",

             dose      = dose_150_qd,

             nbr.doses = 28,

             dosing.interval = 24,

             start.time = 0) %>%

  #0-24h after the last dose

  add.sampling(seq(from = 648, to = 672, by = 0.1))

#Perform simulation

#Total number of subject: 1000

sim12 <- rxSolve(mod5, theta, ev5, omega=omega, sigma=sigma, nSub=1000)

#Concerntration

pkslow_14kg <- sim12 %>%

  group_by(time) %>%

  # 10-90% Prediction interval

  summarise(medconc = median(cp),

            lowconc = quantile(cp,0.1),

            highconc = quantile(cp, 0.9)) %>%

  ungroup() %>%

  # time after last dose

  mutate(tald = time-648)

#make the margin smooth by lowess

l0.1 <- lowess(pkslow_14kg$tald, pkslow_14kg$lowconc, f=0.02)

l0.5 <- lowess(pkslow_14kg$tald, pkslow_14kg$medconc, f=0.02)

l0.9 <- lowess(pkslow_14kg$tald, pkslow_14kg$highconc, f=0.02)

df0.1 <- data.frame(tald=l0.1$x, lowconc=l0.1$y)

df0.5 <- data.frame(tald=l0.5$x, medconc=l0.5$y)

df0.9 <- data.frame(tald=l0.9$x, highconc=l0.9$y)

pkslow_14dat <- df0.1 %>%

  left_join(df0.5,by="tald") %>%

  left_join(df0.9,by="tald") %>%

  mutate(lowconc=case_when(lowconc<=0~0,TRUE~as.numeric(lowconc)))

dat12 <- pkslow_14dat %>%

  mutate(

    Study = "Panjasawatwong N. (2021)",

    drug  = "Isoniazid",

    pop   = "NAT2_SA"

  )

#---------------output-----------------####

#y_breaks <- c()

label_name <- c("Panjasawatwong N. (2021)")

# concentration

pl12 <- pkslow_14dat %>%

  ggplot(mapping=aes(x=tald, y=medconc)) +

  geom_line(size=1.0, color="#4A6990FF") +

  geom_ribbon(aes(x=tald,ymin=lowconc,ymax=highconc), fill = "#7AA6DCFF",alpha=0.2) +

  theme_bw(base_size = 30) +

  labs(title = "Study5. SA 150mg 14kg")+

  scale_x_continuous("Time (h)", limits = c(-0.1,24.1), breaks = c(0,4,8,12,16,20,24)) +

  scale_y_continuous("Concentration (mg/L)",limits = c(-0.1,12), breaks = c(0,2.5,5,7.5,10)) +

  theme (legend.position = "none",

         plot.background = element_blank(),

         panel.grid.minor = element_blank(),

         panel.grid.major = element_blank())

jpeg(filename = paste0(output_dir,"/5.Panjaswatsong_SA150mg.jpg"),

     width=5000, height=4500, res=300)

print(pl12)

dev.off()

#NAT2nonslow----------

# Typical patient1: NAT2_nonslow

# Dose: oral 150mg qd

# Body Weight: 14kg

# MAT: 2.76 years

BW   <- 14 #kg

NAT2 <- 0

MAT  <- 33.33 #monthes

#Define fixed effect parameters

theta <- c(TVCL=9.43*(BW/10.9)^0.75*(1-NAT2)*MAT^4.7/(MAT^4.7+12.7^4.7),

           TVV2=3.78*(BW/10.9)^1,

           TVQ =28.0*(BW/10.9)^0.75,

           TVV3=15.3*(BW/10.9)^1)

#Perform simulation

#Total number of subject: 1000

sim13 <- rxSolve(mod5, theta, ev5, omega=omega, sigma=sigma, nSub=1000)

#Concerntration

pknonslow_14kg <- sim13 %>%

  group_by(time) %>%

  # 10-90% Prediction interval

  summarise(medconc = median(cp),

            lowconc = quantile(cp,0.1),

            highconc = quantile(cp, 0.9)) %>%

  ungroup() %>%

  # time after last dose

  mutate(tald = time-648)

#make the margin smooth by lowess

l0.1 <- lowess(pknonslow_14kg$tald, pknonslow_14kg$lowconc, f=0.02)

l0.5 <- lowess(pknonslow_14kg$tald, pknonslow_14kg$medconc, f=0.02)

l0.9 <- lowess(pknonslow_14kg$tald, pknonslow_14kg$highconc, f=0.02)

df0.1 <- data.frame(tald=l0.1$x, lowconc=l0.1$y)

df0.5 <- data.frame(tald=l0.5$x, medconc=l0.5$y)

df0.9 <- data.frame(tald=l0.9$x, highconc=l0.9$y)

pknslow_14dat <- df0.1 %>%

  left_join(df0.5,by="tald") %>%

  left_join(df0.9,by="tald") %>%

  mutate(lowconc=case_when(lowconc<=0~0,TRUE~as.numeric(lowconc)))

dat13 <- pknslow_14dat %>%

  mutate(

    Study = "Panjasawatwong N. (2021)",

    drug  = "Isoniazid",

    pop   = "NAT2_nonSA"

  )

#---------------output-----------------####

#y_breaks <- c()

label_name <- c("Panjasawatwong N. (2021)")

# concentration

pl13 <- pknslow_14dat %>%

  ggplot(mapping=aes(x=tald, y=medconc)) +

  geom_line(size=1.0, color="#4A6990FF") +

  geom_ribbon(aes(x=tald,ymin=lowconc,ymax=highconc), fill = "#7AA6DCFF",alpha=0.2) +

  theme_bw(base_size = 30) +

  labs(title = "Study5. nonSA 150mg 14kg")+

  scale_x_continuous("Time (h)", limits = c(-0.1,24.1), breaks = c(0,4,8,12,16,20,24)) +

  scale_y_continuous("Concentration (mg/L)",limits = c(-0.1,12), breaks = c(0,2.5,5,7.5,10)) +

  theme (legend.position = "none",

         plot.background = element_blank(),

         panel.grid.minor = element_blank(),

         panel.grid.major = element_blank())

jpeg(filename = paste0(output_dir,"/5.Panjaswatsong_NS150mg.jpg"),

     width=5000, height=4500, res=300)

print(pl13)

dev.off()

# 6.## Chen B. (2022)## China-------------

# Define model -------------------

# CL    = 28.7 * exp(-0.55 * Genotype) (L/h)

# Vc    = 54.1 (L)

# KA    = 3.91 (h-1)

# Genotype wt/wt(RA)  = 0

# Genotype m/wt(IA)   = 1

# Genotype m/m(SA)    = 2

# sigma Plasma (additive error on the logarithmic scale) add.plasma: 0.474

# Ka  = 1.70  (h-1)

# BSV (CV%): Q  = 30.7%

# BSV (CV%): Vc = 19.4%

# BSV (CV%): KA = 55.2%

# prop.err.sd   = 33.3%

# Typical patient1: NAT2_RA

# Typical patient2: NAT2_IA

# Typical patient3: NAT2_SA

# Dose: oral 300mg qd

set.seed(90601)

rxSetSeed(90601)

mod6 <- RxODE({

  CL        = TVCL * exp(eta.CL);

  V         = TVV  * exp(eta.V);

  KA        = TVKA * exp(eta.KA);

  C2          = centr/V;

  d/dt(depot) = -KA * depot;

  d/dt(centr) =  KA * depot - CL * C2

  cp = C2 * (1 + prop.err.sd)

})

#NAT2RA----------

# Typical patient1: NAT2_RA

# Dose: oral 300mg qd

NAT2 <- 0

#Define fixed effect parameters

theta <- c(TVCL=28.7 * exp(-0.55 * NAT2),

           TVV =54.1,

           TVKA=3.91)

# Define between subject variability

omega <- lotri(eta.CL ~ 0.307^2,

               eta.V  ~ 0.194^2,

               eta.KA ~ 0.552^2)

#Define unexplained variability

sigma <- lotri(prop.err.sd  ~ 0.333)

#Dose of Oral input qd--------------------

dose_300_qd <- 300 #300mg/d

#Define event record

ev6 <- et(amount.units = "mg", time.units = "hours") %>%

  add.dosing(dosing.to = "depot",

             dose      = dose_300_qd,

             nbr.doses = 28,

             dosing.interval = 24,

             start.time = 0) %>%

  #0-24h after the last dose

  add.sampling(seq(from = 648, to = 672, by = 0.1))

#Perform simulation

#Total number of subject: 1000

sim14 <- rxSolve(mod6, theta, ev6, omega=omega, sigma=sigma, nSub=1000)

#Concerntration

pkRA_300mg <- sim14 %>%

  group_by(time) %>%

  # 10-90% Prediction interval

  summarise(medconc = median(cp),

            lowconc = quantile(cp,0.1),

            highconc = quantile(cp, 0.9)) %>%

  ungroup() %>%

  # time after last dose

  mutate(tald = time-648)

#make the margin smooth by lowess

l0.1 <- lowess(pkRA_300mg$tald, pkRA_300mg$lowconc, f=0.02)

l0.5 <- lowess(pkRA_300mg$tald, pkRA_300mg$medconc, f=0.02)

l0.9 <- lowess(pkRA_300mg$tald, pkRA_300mg$highconc, f=0.02)

df0.1 <- data.frame(tald=l0.1$x, lowconc=l0.1$y)

df0.5 <- data.frame(tald=l0.5$x, medconc=l0.5$y)

df0.9 <- data.frame(tald=l0.9$x, highconc=l0.9$y)

pkRA_300dat <- df0.1 %>%

  left_join(df0.5,by="tald") %>%

  left_join(df0.9,by="tald") %>%

  mutate(lowconc=case_when(lowconc<=0~0,TRUE~as.numeric(lowconc)))

dat14 <- pkRA_300dat %>%

  mutate(

    Study = "Chen B. (2022)",

    drug  = "Isoniazid",

    pop   = "NAT2_RA"

  )

#---------------output-----------------####

#y_breaks <- c()

label_name <- c("Chen B. (2022)")

# concentration

pl14 <- pkRA_300dat %>%

  ggplot(mapping=aes(x=tald, y=medconc)) +

  geom_line(size=1.0, color="#4A6990FF") +

  geom_ribbon(aes(x=tald,ymin=lowconc,ymax=highconc), fill = "#7AA6DCFF",alpha=0.2) +

  theme_bw(base_size = 30) +

  labs(title = "Study6. RA 300mg")+

  scale_x_continuous("Time (h)", limits = c(-0.1,24.1), breaks = c(0,4,8,12,16,20,24)) +

  scale_y_continuous("Concentration (mg/L)",limits = c(-0.1,12), breaks = c(0,2.5,5,7.5,10)) +

  theme (legend.position = "none",

         plot.background = element_blank(),

         panel.grid.minor = element_blank(),

         panel.grid.major = element_blank())

jpeg(filename = paste0(output_dir,"/6.Chen_RA300mg.jpg"),

     width=5000, height=4500, res=300)

print(pl14)

dev.off()

#NAT2IA----------

# Typical patient1: NAT2_IA

# Dose: oral 300mg qd

NAT2 <- 1

#Define fixed effect parameters

theta <- c(TVCL=28.7 * exp(-0.55 * NAT2),

           TVV =54.1,

           TVKA=3.91)

#Perform simulation

#Total number of subject: 1000

sim15 <- rxSolve(mod6, theta, ev6, omega=omega, sigma=sigma, nSub=1000)

#Concerntration

pkIA_300mg <- sim15 %>%

  group_by(time) %>%

  # 10-90% Prediction interval

  summarise(medconc = median(cp),

            lowconc = quantile(cp,0.1),

            highconc = quantile(cp, 0.9)) %>%

  ungroup() %>%

  # time after last dose

  mutate(tald = time-648)

#make the margin smooth by lowess

l0.1 <- lowess(pkIA_300mg$tald, pkIA_300mg$lowconc, f=0.02)

l0.5 <- lowess(pkIA_300mg$tald, pkIA_300mg$medconc, f=0.02)

l0.9 <- lowess(pkIA_300mg$tald, pkIA_300mg$highconc, f=0.02)

df0.1 <- data.frame(tald=l0.1$x, lowconc=l0.1$y)

df0.5 <- data.frame(tald=l0.5$x, medconc=l0.5$y)

df0.9 <- data.frame(tald=l0.9$x, highconc=l0.9$y)

pkIA_300dat <- df0.1 %>%

  left_join(df0.5,by="tald") %>%

  left_join(df0.9,by="tald") %>%

  mutate(lowconc=case_when(lowconc<=0~0,TRUE~as.numeric(lowconc)))

dat15 <- pkIA_300dat %>%

  mutate(

    Study = "Chen B. (2022)",

    drug  = "Isoniazid",

    pop   = "NAT2_IA"

  )

#---------------output-----------------####

#y_breaks <- c()

label_name <- c("Chen B. (2022)")

# concentration

pl15 <- pkIA_300dat %>%

  ggplot(mapping=aes(x=tald, y=medconc)) +

  geom_line(size=1.0, color="#4A6990FF") +

  geom_ribbon(aes(x=tald,ymin=lowconc,ymax=highconc), fill = "#7AA6DCFF",alpha=0.2) +

  theme_bw(base_size = 30) +

  labs(title = "Study6. IA 300mg")+

  scale_x_continuous("Time (h)", limits = c(-0.1,24.1), breaks = c(0,4,8,12,16,20,24)) +

  scale_y_continuous("Concentration (mg/L)",limits = c(-0.1,12), breaks = c(0,2.5,5,7.5,10)) +

  theme (legend.position = "none",

         plot.background = element_blank(),

         panel.grid.minor = element_blank(),

         panel.grid.major = element_blank())

jpeg(filename = paste0(output_dir,"/6.Chen_IA300mg.jpg"),

     width=5000, height=4500, res=300)

print(pl15)

dev.off()

#NAT2SA----------

# Typical patient1: NAT2_SA

# Dose: oral 300mg qd

NAT2 <- 2

#Define fixed effect parameters

theta <- c(TVCL=28.7 * exp(-0.55 * NAT2),

           TVV =54.1,

           TVKA=3.91)

#Perform simulation

#Total number of subject: 1000

sim16 <- rxSolve(mod6, theta, ev6, omega=omega, sigma=sigma, nSub=1000)

#Concerntration

pkSA_300mg <- sim16 %>%

  group_by(time) %>%

  # 10-90% Prediction interval

  summarise(medconc = median(cp),

            lowconc = quantile(cp,0.1),

            highconc = quantile(cp, 0.9)) %>%

  ungroup() %>%

  # time after last dose

  mutate(tald = time-648)

#make the margin smooth by lowess

l0.1 <- lowess(pkSA_300mg$tald, pkSA_300mg$lowconc, f=0.028)

l0.5 <- lowess(pkSA_300mg$tald, pkSA_300mg$medconc, f=0.028)

l0.9 <- lowess(pkSA_300mg$tald, pkSA_300mg$highconc, f=0.028)

df0.1 <- data.frame(tald=l0.1$x, lowconc=l0.1$y)

df0.5 <- data.frame(tald=l0.5$x, medconc=l0.5$y)

df0.9 <- data.frame(tald=l0.9$x, highconc=l0.9$y)

pkSA_300dat <- df0.1 %>%

  left_join(df0.5,by="tald") %>%

  left_join(df0.9,by="tald") %>%

  mutate(lowconc=case_when(lowconc<=0~0,TRUE~as.numeric(lowconc)))

dat16 <- pkSA_300dat %>%

  mutate(

    Study = "Chen B. (2022)",

    drug  = "Isoniazid",

    pop   = "NAT2_SA"

  )

#---------------output-----------------####

#y_breaks <- c()

label_name <- c("Chen B. (2022)")

# concentration

pl16 <- pkSA_300dat %>%

  ggplot(mapping=aes(x=tald, y=medconc)) +

  geom_line(size=1.0, color="#4A6990FF") +

  geom_ribbon(aes(x=tald,ymin=lowconc,ymax=highconc), fill = "#7AA6DCFF",alpha=0.2) +

  theme_bw(base_size = 30) +

  labs(title = "Study6. SA 300mg")+

  scale_x_continuous("Time (h)", limits = c(-0.1,24.1), breaks = c(0,4,8,12,16,20,24)) +

  scale_y_continuous("Concentration (mg/L)",limits = c(-0.1,12), breaks = c(0,2.5,5,7.5,10)) +

  theme (legend.position = "none",

         plot.background = element_blank(),

         panel.grid.minor = element_blank(),

         panel.grid.major = element_blank())

jpeg(filename = paste0(output_dir,"/6.Chen_SA300mg.jpg"),

     width=5000, height=4500, res=300)

print(pl16)

dev.off()

# 7.## Huerta-García AP. (2020)## Russia-----------------

# Define model -----------------------

# CL_SA = 11.4 (L/h)

# CL_IA = 19.2 (L/h)

# CL_RA = 27.4 (L/h)

# V2    = 1.5 * BMI (L)

# mean_BMI = 21.7

# KA    = 2

# Q     = 9.9 (L/h)

# V3    = 3.8 (L)

# BSV (CV%): CL = 47.0%

# BSV (CV%): V2 = 59.4%

# BSV (CV%): V3 = 114 %

# BSV (CV%): KA = 113.6%

# prop.err.sd   = 42.9%

# Typical patient1: NAT2_SA

# Typical patient2: NAT2_IA

# Typical patient3: NAT2_RA

# Dose: oral 300mg qd

# BMI : 21.7 kg/m2

set.seed(90603)

rxSetSeed(90603)

mod7 <- RxODE({

  CL        = TVCL * exp(eta.CL);

  V2        = TVV2 * exp(eta.V2);

  Q         = TVQ ;

  V3        = TVV3 * exp(eta.V3);

  KA        = TVKA * exp(eta.KA);

  C2          = centr/V2;

  C3          = peri/V3 ;

  d/dt(depot) = -KA * depot;

  d/dt(centr) =  KA * depot - CL * C2 + Q * (C3 - C2);

  d/dt(peri)  =  Q  * C2 - Q * C3;

  cp = C2 * (1 + prop.err.sd)

})

#NAT2SA----------

# Typical patient1: NAT2_SA

# Dose: oral 300mg qd

# BMI: 21.7 kg/m2

BMI <- 21.7

#Define fixed effect parameters

theta <- c(TVCL=11.4,

           TVV2=1.5*BMI,

           TVQ =9.9,

           TVV3=3.8,

           TVKA=2.0)

# Define between subject variability

omega <- lotri(eta.CL ~ 0.47 ^2,

               eta.V2 ~ 0.594^2,

               eta.V3 ~ 1.14 ^2,

               eta.KA ~ 1.136^2)

#Define unexplained variability

sigma <- lotri(prop.err.sd  ~ 0.429)

#Dose of Oral input qd--------------------

dose_300_qd <- 300 #150mg/d

#Define event record

ev7 <- et(amount.units = "mg", time.units = "hours") %>%

  add.dosing(dosing.to = "depot",

             dose      = dose_300_qd,

             nbr.doses = 28,

             dosing.interval = 24,

             start.time = 0) %>%

  #0-24h after the last dose

  add.sampling(seq(from = 648, to = 672, by = 0.5))

#Perform simulation

#Total number of subject: 1000

sim17 <- rxSolve(mod7, theta, ev7, omega=omega, sigma=sigma, nSub=1000)

#Concerntration

pkSA_BMI <- sim17 %>%

  group_by(time) %>%

  # 10-90% Prediction interval

  summarise(medconc = median(cp),

            lowconc = quantile(cp,0.1),

            highconc = quantile(cp, 0.9)) %>%

  ungroup() %>%

  # time after last dose

  mutate(tald = time-648)

#make the margin smooth by lowess

l0.1 <- lowess(pkSA_BMI$tald, pkSA_BMI$lowconc, f=0.04)

l0.5 <- lowess(pkSA_BMI$tald, pkSA_BMI$medconc, f=0.04)

l0.9 <- lowess(pkSA_BMI$tald, pkSA_BMI$highconc, f=0.04)

df0.1 <- data.frame(tald=l0.1$x, lowconc=l0.1$y)

df0.5 <- data.frame(tald=l0.5$x, medconc=l0.5$y)

df0.9 <- data.frame(tald=l0.9$x, highconc=l0.9$y)

pkSA_BMI_dat <- df0.1 %>%

  left_join(df0.5,by="tald") %>%

  left_join(df0.9,by="tald") %>%

  mutate(lowconc=case_when(lowconc<=0~0,TRUE~as.numeric(lowconc)))

dat17 <- pkSA_BMI_dat %>%

  mutate(

    Study = "Huerta-García AP. (2020)",

    drug  = "Isoniazid",

    pop   = "NAT2_SA"

  )

#---------------output-----------------####

#y_breaks <- c()

label_name <- c("Huerta-García AP. (2020)")

# concentration

pl17 <- pkSA_BMI_dat %>%

  ggplot(mapping=aes(x=tald, y=medconc)) +

  geom_line(size=1.0, color="#4A6990FF") +

  geom_ribbon(aes(x=tald,ymin=lowconc,ymax=highconc), fill = "#7AA6DCFF",alpha=0.2) +

  theme_bw(base_size = 30) +

  labs(title = "Study7. SA 300mg")+

  scale_x_continuous("Time (h)", limits = c(-0.1,24.1), breaks = c(0,4,8,12,16,20,24)) +

  scale_y_continuous("Concentration (mg/L)",limits = c(-0.1,12), breaks = c(0,2.5,5,7.5,10)) +

  theme (legend.position = "none",

         plot.background = element_blank(),

         panel.grid.minor = element_blank(),

         panel.grid.major = element_blank())

jpeg(filename = paste0(output_dir,"/7.Huerta_SABMI.jpg"),

     width=5000, height=4500, res=300)

print(pl17)

dev.off()

#NAT2IA----------

# Typical patient1: NAT2_IA

# Dose: oral 300mg qd

# BMI: 21.7 kg/m2

BMI <- 21.7

#Define fixed effect parameters

theta <- c(TVCL=19.2,

           TVV2=1.5*BMI,

           TVQ =9.9,

           TVV3=3.8,

           TVKA=2.0)

#Perform simulation

#Total number of subject: 1000

sim18 <- rxSolve(mod7, theta, ev7, omega=omega, sigma=sigma, nSub=1000)

#Concerntration

pkIA_BMI <- sim18 %>%

  group_by(time) %>%

  # 10-90% Prediction interval

  summarise(medconc = median(cp),

            lowconc = quantile(cp,0.1),

            highconc = quantile(cp, 0.9)) %>%

  ungroup() %>%

  # time after last dose

  mutate(tald = time-648)

#make the margin smooth by lowess

l0.1 <- lowess(pkIA_BMI$tald, pkIA_BMI$lowconc, f=0.028)

l0.5 <- lowess(pkIA_BMI$tald, pkIA_BMI$medconc, f=0.028)

l0.9 <- lowess(pkIA_BMI$tald, pkIA_BMI$highconc, f=0.028)

df0.1 <- data.frame(tald=l0.1$x, lowconc=l0.1$y)

df0.5 <- data.frame(tald=l0.5$x, medconc=l0.5$y)

df0.9 <- data.frame(tald=l0.9$x, highconc=l0.9$y)

pkIA_BMI_dat <- df0.1 %>%

  left_join(df0.5,by="tald") %>%

  left_join(df0.9,by="tald") %>%

  mutate(lowconc=case_when(lowconc<=0~0,TRUE~as.numeric(lowconc)))

dat18 <- pkIA_BMI_dat %>%

  mutate(

    Study = "Huerta-García AP. (2020)",

    drug  = "Isoniazid",

    pop   = "NAT2_IA"

  )

#---------------output-----------------####

#y_breaks <- c()

label_name <- c("Huerta-García AP. (2020)")

# concentration

pl18 <- pkIA_BMI_dat %>%

  ggplot(mapping=aes(x=tald, y=medconc)) +

  geom_line(size=1.0, color="#4A6990FF") +

  geom_ribbon(aes(x=tald,ymin=lowconc,ymax=highconc), fill = "#7AA6DCFF",alpha=0.2) +

  theme_bw(base_size = 30) +

  labs(title = "Study7. IA 300mg")+

  scale_x_continuous("Time (h)", limits = c(-0.1,24.1), breaks = c(0,4,8,12,16,20,24)) +

  scale_y_continuous("Concentration (mg/L)",limits = c(-0.1,12), breaks = c(0,2.5,5,7.5,10)) +

  theme (legend.position = "none",

         plot.background = element_blank(),

         panel.grid.minor = element_blank(),

         panel.grid.major = element_blank())

jpeg(filename = paste0(output_dir,"/7.Huerta_IABMI.jpg"),

     width=5000, height=4500, res=300)

print(pl18)

dev.off()

#NAT2RA----------

# Typical patient1: NAT2_RA

# Dose: oral 300mg qd

# BMI: 21.7 kg/m2

BMI <- 21.7

#Define fixed effect parameters

theta <- c(TVCL=27.4,

           TVV2=1.5*BMI,

           TVQ =9.9,

           TVV3=3.8,

           TVKA=2.0)

#Perform simulation

#Total number of subject: 1000

sim19 <- rxSolve(mod7, theta, ev7, omega=omega, sigma=sigma, nSub=1000)

#Concerntration

pkRA_BMI <- sim19 %>%

  group_by(time) %>%

  # 10-90% Prediction interval

  summarise(medconc = median(cp),

            lowconc = quantile(cp,0.1),

            highconc = quantile(cp, 0.9)) %>%

  ungroup() %>%

  # time after last dose

  mutate(tald = time-648)

#make the margin smooth by lowess

l0.1 <- lowess(pkRA_BMI$tald, pkRA_BMI$lowconc, f=0.028)

l0.5 <- lowess(pkRA_BMI$tald, pkRA_BMI$medconc, f=0.028)

l0.9 <- lowess(pkRA_BMI$tald, pkRA_BMI$highconc, f=0.028)

df0.1 <- data.frame(tald=l0.1$x, lowconc=l0.1$y)

df0.5 <- data.frame(tald=l0.5$x, medconc=l0.5$y)

df0.9 <- data.frame(tald=l0.9$x, highconc=l0.9$y)

pkRA_BMI_dat <- df0.1 %>%

  left_join(df0.5,by="tald") %>%

  left_join(df0.9,by="tald") %>%

  mutate(lowconc=case_when(lowconc<=0~0,TRUE~as.numeric(lowconc)))

dat19 <- pkRA_BMI_dat %>%

  mutate(

    Study = "Huerta-García AP. (2020)",

    drug  = "Isoniazid",

    pop   = "NAT2_RA" )

#---------------output-----------------####

#y_breaks <- c()

label_name <- c("Huerta-García AP. (2020)")

# concentration

pl19 <- pkRA_BMI_dat %>%

  ggplot(mapping=aes(x=tald, y=medconc)) +

  geom_line(size=1.0, color="#4A6990FF") +

  geom_ribbon(aes(x=tald,ymin=lowconc,ymax=highconc), fill = "#7AA6DCFF",alpha=0.2) +

  theme_bw(base_size = 30) +

  labs(title = "Study7. RA 300mg")+

  scale_x_continuous("Time (h)", limits = c(-0.1,24.1), breaks = c(0,4,8,12,16,20,24)) +

  scale_y_continuous("Concentration (mg/L)",limits = c(-0.1,12), breaks = c(0,2.5,5,7.5,10)) +

  theme (legend.position = "none",

         plot.background = element_blank(),

         panel.grid.minor = element_blank(),

         panel.grid.major = element_blank())

jpeg(filename = paste0(output_dir,"/7.Huerta_RABMI.jpg"),

     width=5000, height=4500, res=300)

print(pl19)

dev.off()

# 8.## Abdelwahab MT. (2020)## South Afirca## Pregnant Women----------------------

# Define model ---------------

# CL     = NAT2*(BW/65.3)^0.75 (L/h)

# NAT2SA = 29.0 (L/h)

# NAT2IA = 75.7 (L/h)

# NAT2RA = 97.1 (L/h)

# V2     = 130*(BW/65.3) (L)

# F      = 1

# Q      = 12.4*(BW/65.3)^0.75 (L/h)

# V3     = 28.5*(BW/65.3) (L)

# MTT    = 1.21 (h)

# NN     = 8.01

# BSV (CV%): CL = 12.7%

# BOV (CV%): MTT= 56.7%

# BOV (CV%): F  = 36.7%

# prop.err.sd   = 22.2%

# add.err.sd    = 0.045

# Typical patient1: NAT2_SA

# Typical patient2: NAT2_IA

# Typical patient3: NAT2_RA

# Dose: oral 300mg qd

# Body weight = 60kg

set.seed(90604)

rxSetSeed(90604)

mod8 <- RxODE({

  CL  = TVCL  * exp(eta.CL);

  V2  = TVV2 ;

  Q   = TVQ  ;

  V3  = TVV3 ;

  BIO = TVBIO * exp(iov.BIO);

  MTT = TVMTT * exp(iov.MTT);

  NT  = TVNT;

  KTR = (NT+1)/MTT

  KA  = KTR

  C2          = centr/V2;

  C3          = peri/V3 ;

  d/dt(depot) = transit(NT,MTT,BIO)-KA * depot;

  d/dt(centr) = KA * depot - CL * C2 + Q * (C3 - C2);

  d/dt(peri)  = Q  * C2 - Q * C3;

  cp = C2 * (1 + prop.err.sd) + add.err.sd

})

#NAT2SA----------

# Typical patient1: NAT2_SA

# Dose: oral 300mg qd

BW <- 60 #kg

#Define fixed effect parameters

theta <- c(TVCL =29.0*(BW/65.3)^0.75,

           TVV2 =130*(BW/65.3),

           TVQ  =12.4*(BW/65.3)^0.75,

           TVV3 =28.5*(BW/65.3),

           TVMTT=1.21,

           TVNT =8.01,

           TVBIO=1)

# Define between subject variability

omega <- lotri(eta.CL  ~ 0.127^2,

               iov.MTT ~ 0.567^2,

               iov.BIO ~ 0.367^2)

#Define unexplained variability

sigma <- lotri(add.err.sd  ~ 0.045,

               prop.err.sd ~ 0.222)

#Dose of Oral input qd--------------------

dose_300_qd <- 300 #300mg/d

#Define event record

ev8 <- et(amount.units = "mg", time.units = "hours") %>%

  add.dosing(dosing.to = "depot",

             dose      = dose_300_qd,

             nbr.doses = 28,

             dosing.interval = 24,

             start.time = 0) %>%

  #0-24h after the last dose

  add.sampling(seq(from = 648, to = 672, by = 0.1))

#Perform simulation

#Total number of subject: 1000

sim20 <- rxSolve(mod8, theta, ev8, omega=omega, sigma=sigma, nSub=1000)

#Concerntration

pkSA_300mg <- sim20 %>%

  group_by(time) %>%

  # 10-90% Prediction interval

  summarise(medconc = median(cp),

            lowconc = quantile(cp,0.1),

            highconc = quantile(cp, 0.9)) %>%

  ungroup() %>%

  # time after last dose

  mutate(tald = time-648)

#make the margin smooth by lowess

l0.1 <- lowess(pkSA_300mg$tald, pkSA_300mg$lowconc, f=0.028)

l0.5 <- lowess(pkSA_300mg$tald, pkSA_300mg$medconc, f=0.028)

l0.9 <- lowess(pkSA_300mg$tald, pkSA_300mg$highconc, f=0.028)

df0.1 <- data.frame(tald=l0.1$x, lowconc=l0.1$y)

df0.5 <- data.frame(tald=l0.5$x, medconc=l0.5$y)

df0.9 <- data.frame(tald=l0.9$x, highconc=l0.9$y)

pkSA_300_dat <- df0.1 %>%

  left_join(df0.5,by="tald") %>%

  left_join(df0.9,by="tald") %>%

  mutate(lowconc=case_when(lowconc<=0~0,TRUE~as.numeric(lowconc)))

dat20 <- pkSA_300_dat %>%

  mutate(

    Study = "Abdelwahab MT. (2020)",

    drug  = "Isoniazid",

    pop   = "NAT2_SA"

  )

#---------------output-----------------####

#y_breaks <- c()

label_name <- c("Abdelwahab MT. (2020)")

# concentration

pl20 <- pkSA_300_dat %>%

  ggplot(mapping=aes(x=tald, y=medconc)) +

  geom_line(size=1.0, color="#4A6990FF") +

  geom_ribbon(aes(x=tald,ymin=lowconc,ymax=highconc), fill = "#7AA6DCFF",alpha=0.2) +

  theme_bw(base_size = 30) +

  labs(title = "Study8. SA 300mg")+

  scale_x_continuous("Time (h)", limits = c(-0.1,24.1), breaks = c(0,4,8,12,16,20,24)) +

  scale_y_continuous("Concentration (mg/L)",limits = c(-0.1,12), breaks = c(0,2.5,5,7.5,10)) +

  theme (legend.position = "none",

         plot.background = element_blank(),

         panel.grid.minor = element_blank(),

         panel.grid.major = element_blank())

jpeg(filename = paste0(output_dir,"/8.Abdelwahab_SA300.jpg"),

     width=5000, height=4500, res=300)

print(pl20)

dev.off()

#NAT2IA----------

# Typical patient1: NAT2_IA

# Dose: oral 300mg qd

#Define fixed effect parameters

theta <- c(TVCL =75.7*(BW/65.3)^0.75,

           TVV2 =130*(BW/65.3),

           TVQ  =12.4*(BW/65.3)^0.75,

           TVV3 =28.5*(BW/65.3),

           TVMTT=1.21,

           TVNT =8.01,

           TVBIO=1)

#Perform simulation

#Total number of subject: 1000

sim21 <- rxSolve(mod8, theta, ev8, omega=omega, sigma=sigma, nSub=1000)

#Concerntration

pkIA_300mg <- sim21 %>%

  group_by(time) %>%

  # 10-90% Prediction interval

  summarise(medconc = median(cp),

            lowconc = quantile(cp,0.1),

            highconc = quantile(cp, 0.9)) %>%

  ungroup() %>%

  # time after last dose

  mutate(tald = time-648)

#make the margin smooth by lowess

l0.1 <- lowess(pkIA_300mg$tald, pkIA_300mg$lowconc, f=0.028)

l0.5 <- lowess(pkIA_300mg$tald, pkIA_300mg$medconc, f=0.028)

l0.9 <- lowess(pkIA_300mg$tald, pkIA_300mg$highconc, f=0.028)

df0.1 <- data.frame(tald=l0.1$x, lowconc=l0.1$y)

df0.5 <- data.frame(tald=l0.5$x, medconc=l0.5$y)

df0.9 <- data.frame(tald=l0.9$x, highconc=l0.9$y)

pkIA_300_dat <- df0.1 %>%

  left_join(df0.5,by="tald") %>%

  left_join(df0.9,by="tald") %>%

  mutate(lowconc=case_when(lowconc<=0~0,TRUE~as.numeric(lowconc)))

dat21 <- pkIA_300_dat %>%

  mutate(

    Study = "Abdelwahab MT. (2020)",

    drug  = "Isoniazid",

    pop   = "NAT2_IA"

  )

#---------------output-----------------####

#y_breaks <- c()

label_name <- c("Abdelwahab MT. (2020)")

# concentration

pl21 <- pkIA_300_dat %>%

  ggplot(mapping=aes(x=tald, y=medconc)) +

  geom_line(size=1.0, color="#4A6990FF") +

  geom_ribbon(aes(x=tald,ymin=lowconc,ymax=highconc), fill = "#7AA6DCFF",alpha=0.2) +

  theme_bw(base_size = 30) +

  labs(title = "Study8. IA 300mg")+

  scale_x_continuous("Time (h)", limits = c(-0.1,24.1), breaks = c(0,4,8,12,16,20,24)) +

  scale_y_continuous("Concentration (mg/L)",limits = c(-0.1,10.5), breaks = c(0,2.5,5,7.5,10)) +

  theme (legend.position = "none",

         plot.background = element_blank(),

         panel.grid.minor = element_blank(),

         panel.grid.major = element_blank())

jpeg(filename = paste0(output_dir,"/8.Abdelwahab_IA300.jpg"),

     width=5000, height=4500, res=300)

print(pl21)

dev.off()

#NAT2RA----------

# Typical patient1: NAT2_RA

# Dose: oral 300mg qd

#Define fixed effect parameters

theta <- c(TVCL =97.1*(BW/65.3)^0.75,

           TVV2 =130*(BW/65.3),

           TVQ  =12.4*(BW/65.3)^0.75,

           TVV3 =28.5*(BW/65.3),

           TVMTT=1.21,

           TVNT =8.01,

           TVBIO=1)

#Perform simulation

#Total number of subject: 1000

sim22 <- rxSolve(mod8, theta, ev8, omega=omega, sigma=sigma, nSub=1000)

#Concerntration

pkRA_300mg <- sim22 %>%

  group_by(time) %>%

  # 10-90% Prediction interval

  summarise(medconc = median(cp),

            lowconc = quantile(cp,0.1),

            highconc = quantile(cp, 0.9)) %>%

  ungroup() %>%

  # time after last dose

  mutate(tald = time-648)

#make the margin smooth by lowess

l0.1 <- lowess(pkRA_300mg$tald, pkRA_300mg$lowconc, f=0.028)

l0.5 <- lowess(pkRA_300mg$tald, pkRA_300mg$medconc, f=0.028)

l0.9 <- lowess(pkRA_300mg$tald, pkRA_300mg$highconc, f=0.028)

df0.1 <- data.frame(tald=l0.1$x, lowconc=l0.1$y)

df0.5 <- data.frame(tald=l0.5$x, medconc=l0.5$y)

df0.9 <- data.frame(tald=l0.9$x, highconc=l0.9$y)

pkRA_300_dat <- df0.1 %>%

  left_join(df0.5,by="tald") %>%

  left_join(df0.9,by="tald") %>%

  mutate(lowconc=case_when(lowconc<=0~0,TRUE~as.numeric(lowconc)))

dat22 <- pkRA_300_dat %>%

  mutate(

    Study = "Abdelwahab MT. (2020)",

    drug  = "Isoniazid",

    pop   = "NAT2_RA"

  )

#---------------output-----------------####

#y_breaks <- c()

label_name <- c("Abdelwahab MT. (2020)")

# concentration

pl22 <- pkRA_300_dat %>%

  ggplot(mapping=aes(x=tald, y=medconc)) +

  geom_line(size=1.0, color="#4A6990FF") +

  geom_ribbon(aes(x=tald,ymin=lowconc,ymax=highconc), fill = "#7AA6DCFF",alpha=0.2) +

  theme_bw(base_size = 30) +

  labs(title = "Study8. RA 300mg")+

  scale_x_continuous("Time (h)", limits = c(-0.1,24.1), breaks = c(0,4,8,12,16,20,24)) +

  scale_y_continuous("Concentration (mg/L)",limits = c(-0.1,12), breaks = c(0,2.5,5,7.5,10)) +

  theme (legend.position = "none",

         plot.background = element_blank(),

         panel.grid.minor = element_blank(),

         panel.grid.major = element_blank())

jpeg(filename = paste0(output_dir,"/8.Abdelwahab_RA300.jpg"),

     width=5000, height=4500, res=300)

print(pl22)

dev.off()

# 9.## Wilkins JJ. (2011)## South Afirca------------------------------------------

# Define model -------------------

# CL_slow = 9.7 * (BW/70)^0.75 * (1-0.174*HIV status)  (L/h) #HIV status(0=Negative,1=Positive)

# CL_fast = 21.6 * (BW/70)^0.75 * (1-0.174*HIV status) (L/h) #HIV status(0=Negative,1=Positive)

# V2    = 130 57.7 * (BW/70) * (1-0.103 * SEX) (L) #SEX(0=Male,1=Female)

# F1    = 1

# Q     = 3.34 * (BW/70)^0.75 (L/h)

# V3    = 1730 * (BW/70) (L)

# KA    = 1.85 (h-1)

# TLAG  = 0.18 (h)

# Pfast = 0.132

# BIO(F)= 1

# BSV (CV%): CL = 42.9%

# BSV (CV%): V2 = 40.62%

# BSV (CV%): Q  = 96.49%

# BSV (CV%): TLAG  = 94.02%

# BSV (CV%): F1 = 51.19%

# BOV (CV%): KA = 94.92%

# BOV (CV%): F1 = 28.98%

# add.err.sd    = 0.045 #natural logarithmic scale

# Typical patient1: NAT2_slow

# Typical patient2: NAT2_fast

# Dose: oral 300mg qd

# BW: 60kg

# HIV status: negtive = 0

# SEX: Male = 0

set.seed(90701)

rxSetSeed(90701)

mod9 <- RxODE({

  CL  = TVCL  * exp(eta.CL);

  V2  = TVV2  * exp(eta.V2);

  Q   = TVQ   * exp(eta.Q) ;

  V3  = TVV3 ;

  KA  = TVKA  * exp(iov.KA);

  ## Added modeled F and Tlag

  fdepot    = TVF * exp(iov.F) * exp(eta.F)

  alagDepot = TVTLAG* exp(eta.TLAG);

  C2          = centr/V2;

  C3          = peri/V3 ;

  d/dt(depot) = -KA * depot;

  f(depot)    = fdepot

  alag(depot) = alagDepot

  d/dt(centr) = KA * depot - CL * C2 + Q * (C3 - C2);

  d/dt(peri)  = Q  * C2 - Q * C3;

  cp = C2 + add.err.sd

})

#NAT2_slow# 60kg# Male# HIV negtive----------

BW  <- 60 #kg

HIV <- 0  #negtive

SEX <- 0  #Male

#Define fixed effect parameters

theta <- c(TVCL   =9.7 * (BW/70)^0.75 * (1 - 0.174 * HIV),

           TVV2   =57.7 * (BW/70) * (1 - 0.103 * SEX),

           TVQ    =3.34 * (BW/70)^0.75,

           TVV3   =36.8 * (BW/70),

           TVKA   =1.85,

           TVTLAG =0.18,

           TVF    =1)

# Define between subject variability

omega <- lotri(eta.CL   ~ 0.184^2,

               eta.V2   ~ 0.165^2,

               eta.Q    ~ 0.931^2,

               iov.KA   ~ 0.901^2,

               eta.TLAG ~ 0.22 ^2,

               eta.F    ~ 0.262^2,

               iov.F    ~ 0.084^2)

#Define unexplained variability

sigma <- lotri(add.err.sd ~ 0.205)

#Dose of Oral input qd--------------------

dose_300_qd <- 300 #300mg/d

#Define event record

ev9 <- et(amount.units = "mg", time.units = "hours") %>%

  add.dosing(dosing.to = "depot",

             dose      = dose_300_qd,

             nbr.doses = 28,

             dosing.interval = 24,

             start.time = 0) %>%

  #0-24h after the last dose

  add.sampling(seq(from = 648, to = 672, by = 0.1))

#Perform simulation

#Total number of subject: 1000

sim23 <- rxSolve(mod9, theta, ev9, omega=omega, sigma=sigma, nSub=1000)

#Concerntration

pkslow_qd <- sim23 %>%

  group_by(time) %>%

  # 10-90% Prediction interval

  summarise(medconc = median(cp),

            lowconc = quantile(cp,0.1),

            highconc = quantile(cp, 0.9)) %>%

  ungroup() %>%

  # time after last dose

  mutate(tald = time-648)

#make the margin smooth by lowess

l0.1 <- lowess(pkslow_qd$tald, pkslow_qd$lowconc, f=0.028)

l0.5 <- lowess(pkslow_qd$tald, pkslow_qd$medconc, f=0.028)

l0.9 <- lowess(pkslow_qd$tald, pkslow_qd$highconc, f=0.028)

df0.1 <- data.frame(tald=l0.1$x, lowconc=l0.1$y)

df0.5 <- data.frame(tald=l0.5$x, medconc=l0.5$y)

df0.9 <- data.frame(tald=l0.9$x, highconc=l0.9$y)

pkslow_dat <- df0.1 %>%

  left_join(df0.5,by="tald") %>%

  left_join(df0.9,by="tald") %>%

  mutate(lowconc=case_when(lowconc<=0~0,TRUE~as.numeric(lowconc)))

dat23 <- pkslow_dat %>%

  mutate(

    Study = "Wilkins JJ. (2011)",

    drug  = "Isoniazid",

    pop   = "NAT2_slow"

  )

#---------------output-----------------####

#y_breaks <- c()

label_name <- c("Wilkins JJ. (2011)")

# concentration

pl23 <- pkslow_dat %>%

  ggplot(mapping=aes(x=tald, y=medconc)) +

  geom_line(size=1.0, color="#4A6990FF") +

  geom_ribbon(aes(x=tald,ymin=lowconc,ymax=highconc), fill = "#7AA6DCFF",alpha=0.2) +

  theme_bw(base_size = 30) +

  labs(title = "Study9. SA 300mg")+

  scale_x_continuous("Time (h)", limits = c(-0.1,24.1), breaks = c(0,4,8,12,16,20,24)) +

  scale_y_continuous("Concentration (mg/L)",limits = c(-0.1,12), breaks = c(0,2.5,5,7.5,10)) +

  theme (legend.position = "none",

         plot.background = element_blank(),

         panel.grid.minor = element_blank(),

         panel.grid.major = element_blank())

jpeg(filename = paste0(output_dir,"/9.Wilkins2011_SA300mg.jpg"),

     width=5000, height=4500, res=300)

print(pl23)

dev.off()

#NAT2_fast# 60kg# Male# HIV negtive----------

#Define fixed effect parameters

theta <- c(TVCL   =21.6 * (BW/70)^0.75 * (1 - 0.174 * HIV),

           TVV2   =57.7 * (BW/70) * (1 - 0.103 * SEX),

           TVQ    =3.34 * (BW/70)^0.75,

           TVV3   =36.8 * (BW/70),

           TVKA   =1.85,

           TVTLAG =0.18,

           TVF    =1)

#Perform simulation

#Total number of subject: 1000

sim24 <- rxSolve(mod9, theta, ev9, omega=omega, sigma=sigma, nSub=1000)

#Concerntration

pkfast_qd <- sim24 %>%

  group_by(time) %>%

  # 10-90% Prediction interval

  summarise(medconc = median(cp),

            lowconc = quantile(cp,0.1),

            highconc = quantile(cp, 0.9)) %>%

  ungroup() %>%

  # time after last dose

  mutate(tald = time-648)

#make the margin smooth by lowess

l0.1 <- lowess(pkfast_qd$tald, pkfast_qd$lowconc, f=0.022)

l0.5 <- lowess(pkfast_qd$tald, pkfast_qd$medconc, f=0.022)

l0.9 <- lowess(pkfast_qd$tald, pkfast_qd$highconc, f=0.022)

df0.1 <- data.frame(tald=l0.1$x, lowconc=l0.1$y)

df0.5 <- data.frame(tald=l0.5$x, medconc=l0.5$y)

df0.9 <- data.frame(tald=l0.9$x, highconc=l0.9$y)

pkfast_dat <- df0.1 %>%

  left_join(df0.5,by="tald") %>%

  left_join(df0.9,by="tald") %>%

  mutate(lowconc=case_when(lowconc<=0~0,TRUE~as.numeric(lowconc)))

dat24 <- pkfast_dat %>%

  mutate(

    Study = "Wilkins JJ. (2011)",

    drug  = "Isoniazid",

    pop   = "NAT2_fast"

  )

#---------------output-----------------####

#y_breaks <- c()

label_name <- c("Wilkins JJ. (2011)")

# concentration

pl24 <- pkfast_dat %>%

  ggplot(mapping=aes(x=tald, y=medconc)) +

  geom_line(size=1.0, color="#4A6990FF") +

  geom_ribbon(aes(x=tald,ymin=lowconc,ymax=highconc), fill = "#7AA6DCFF",alpha=0.2) +

  theme_bw(base_size = 30) +

  labs(title = "Study9. nonSA 300mg")+

  scale_x_continuous("Time (h)", limits = c(-0.1,24.1), breaks = c(0,4,8,12,16,20,24)) +

  scale_y_continuous("Concentration (mg/L)",limits = c(-0.1,12), breaks = c(0,2.5,5,7.5,10)) +

  theme (legend.position = "none",

         plot.background = element_blank(),

         panel.grid.minor = element_blank(),

         panel.grid.major = element_blank())

jpeg(filename = paste0(output_dir,"/9.Wilkins2011_NS300mg.jpg"),

     width=5000, height=4500, res=300)

print(pl24)

dev.off()

#10.## McCallum AD. (2020)## Malawian---------------

# Define model -------------------------

# CL  = 13.7                   #L/h

# V   = 78.5*(BW/51.1)^1.08    #L

# KA  = 3.29                   #(h-1)

# BSV (CV%): CL = 53.39%

# BSV (CV%): V  = 23.87%

# expo.err.sd    = 0.418

# Typical patient1: 60kg BW

# Dose: oral 300mg qd

# BW: 60kg

set.seed(11201)

rxSetSeed(11201)

mod10 <- RxODE({

  CL  = TVCL  * exp(eta.CL);

  V   = TVV   * exp(eta.V );

  KA  = TVKA ;

  ## Added modeled F and Tlag

  C1          = centr/V;

  d/dt(depot) = -KA * depot;

  d/dt(centr) = KA * depot - CL * C1

  cp = C1 * exp(expo.err.sd)

})

# ----# 60kg#----------

BW  <- 60 #kg

#Define fixed effect parameters

theta <- c(TVCL   =13.7,

           TVV    =78.5 * (BW/51.1),

           TVKA   =3.29)

# Define between subject variability

omega <- lotri(eta.CL   ~ 0.5339^2,

               eta.V    ~ 0.2387^2)

#Define unexplained variability

sigma <- lotri(expo.err.sd ~ 0.418)

#Dose of Oral input qd--------------------

dose_300_qd <- 300 #300mg/d

#Define event record

ev10 <- et(amount.units = "mg", time.units = "hours") %>%

  add.dosing(dosing.to = "depot",

             dose      = dose_300_qd,

             nbr.doses = 28,

             dosing.interval = 24,

             start.time = 0) %>%

  #0-24h after the last dose

  add.sampling(seq(from = 648, to = 672, by = 0.1))

#Perform simulation

#Total number of subject: 1000

sim25 <- rxSolve(mod10, theta, ev10, omega=omega, sigma=sigma, nSub=1000)

#Concerntration

pk_qd <- sim25 %>%

  group_by(time) %>%

  # 10-90% Prediction interval

  summarise(medconc = median(cp),

            lowconc = quantile(cp,0.1),

            highconc = quantile(cp, 0.9)) %>%

  ungroup() %>%

  # time after last dose

  mutate(tald = time-648)

#make the margin smooth by lowess

l0.1 <- lowess(pk_qd$tald, pk_qd$lowconc, f=0.02)

l0.5 <- lowess(pk_qd$tald, pk_qd$medconc, f=0.02)

l0.9 <- lowess(pk_qd$tald, pk_qd$highconc, f=0.02)

df0.1 <- data.frame(tald=l0.1$x, lowconc=l0.1$y)

df0.5 <- data.frame(tald=l0.5$x, medconc=l0.5$y)

df0.9 <- data.frame(tald=l0.9$x, highconc=l0.9$y)

pk_dat <- df0.1 %>%

  left_join(df0.5,by="tald") %>%

  left_join(df0.9,by="tald") %>%

  mutate(lowconc=case_when(lowconc<=0~0,TRUE~as.numeric(lowconc)))

dat25 <- pk_dat %>%

  mutate(

    Study = "McCallum AD. (2020)",

    drug  = "Isoniazid",

    pop   = "NAT2_no"

  )

#---------------output-----------------####

#y_breaks <- c()

label_name <- c("McCallum AD. (2020)")

# concentration

pl25 <- pk_dat %>%

  ggplot(mapping=aes(x=tald, y=medconc)) +

  geom_line(size=1.0, color="#4A6990FF") +

  geom_ribbon(aes(x=tald,ymin=lowconc,ymax=highconc), fill = "#7AA6DCFF",alpha=0.2) +

  theme_bw(base_size = 30) +

  labs(title = "Study9. SA 300mg")+

  scale_x_continuous("Time (h)", limits = c(-0.1,24.1), breaks = c(0,4,8,12,16,20,24)) +

  scale_y_continuous("Concentration (mg/L)",limits = c(-0.1,12), breaks = c(0,2.5,5,7.5,10)) +

  theme (legend.position = "none",

         plot.background = element_blank(),

         panel.grid.minor = element_blank(),

         panel.grid.major = element_blank())

jpeg(filename = paste0(output_dir,"/10.McCallum2020_300mg.jpg"),

     width=5000, height=4500, res=300)

print(pl25)

dev.off()

# 11.## Gao Y. (2021)## China-----------------------

# Define model -------------------------

# CL_SA = 12.6 * (BW/50)^0.55 (L/h)

# CL_IA = 16.0 * (BW/50)^0.55 (L/h)

# CL_RA = 30.6 * (BW/50)^0.55 (L/h)

# V2 = 21.2 (L)

# KA = 0.68

# Q = 8.7 (L/h)

# V3 = 125.8 (L)

# BSV (CV%): CL = 60.9%

# BSV (CV%): V2 = 21.7%

# BSV (CV%): KA = 23.6%

# Add.err.sd = 0.178

# Typical patient1: NAT2_SA

# Typical patient2: NAT2_IA

# Typical patient3: NAT2_RA

# Dose: oral 300mg qd

set.seed(90603)

rxSetSeed(90603)

mod11 <- RxODE({

CL = TVCL * exp(eta.CL);

V2 = TVV2 * exp(eta.V2);

Q = TVQ ;

V3 = TVV3;

KA = TVKA * exp(eta.KA);

C2 = centr/V2;

C3 = peri/V3 ;

d/dt(depot) = -KA * depot;

d/dt(centr) = KA * depot - CL * C2 + Q * (C3 - C2);

d/dt(peri) = Q * C2 - Q * C3;

cp = C2 + add.err.sd

})

#NAT2SA----------

# Typical patient1: NAT2_SA

# Dose: oral 300mg qd

# BW： 60 kg

BW <- 60

#Define fixed effect parameters

theta <- c(TVCL=12.6*(BW/50)^0.55,

TVV2=21.2,

TVQ =8.7,

TVV3=125.8,

TVKA=0.68)

# Define between subject variability

omega <- lotri(eta.CL ~ 0.609^2,

eta.V2 ~ 0.217^2,

eta.KA ~ 0.236^2)

#Define unexplained variability

sigma <- lotri(add.err.sd ~ 0.178)

#Dose of Oral input qd--------------------

dose_300_qd <- 300 #300mg/d

#Define event record

ev11 <- et(amount.units = "mg", time.units = "hours") %>%

add.dosing(dosing.to = "depot",

dose = dose_300_qd,

nbr.doses = 28,

dosing.interval = 24,

start.time = 0) %>%

#0-24h after the last dose

add.sampling(seq(from = 648, to = 672, by = 0.5))

#Perform simulation

#Total number of subject: 1000

sim26 <- rxSolve(mod11, theta, ev11, omega=omega, sigma=sigma, nSub=1000)

#Concerntration

pkSA_60kg <- sim26 %>%

group_by(time) %>%

# 10-90% Prediction interval

summarise(medconc = median(cp),

lowconc = quantile(cp,0.1),

highconc = quantile(cp, 0.9)) %>%

ungroup() %>%

# time after last dose

mutate(tald = time-648)

#make the margin smooth by lowess

l0.1 <- lowess(pkSA_60kg$tald, pkSA_60kg$lowconc, f=0.04)

l0.5 <- lowess(pkSA_60kg$tald, pkSA_60kg$medconc, f=0.04)

l0.9 <- lowess(pkSA_60kg$tald, pkSA_60kg$highconc, f=0.04)

df0.1 <- data.frame(tald=l0.1$x, lowconc=l0.1$y)

df0.5 <- data.frame(tald=l0.5$x, medconc=l0.5$y)

df0.9 <- data.frame(tald=l0.9$x, highconc=l0.9$y)

pkSA_60kg <- df0.1 %>%

left_join(df0.5,by="tald") %>%

left_join(df0.9,by="tald") %>%

mutate(lowconc=case_when(lowconc<=0~0,TRUE~as.numeric(lowconc)))

dat26 <- pkSA_60kg %>%

mutate(

Study = "Gao Y. (2021)",

drug = "Isoniazid",

pop = "NAT2_SA"

)

#---------------output-----------------####

#y_breaks <- c()

label_name <- c("Gao Y. (2021)")

# concentration

pl26 <- pkSA_60kg %>%

ggplot(mapping=aes(x=tald, y=medconc)) +

geom_line(size=1.0, color="#4A6990FF") +

geom_ribbon(aes(x=tald,ymin=lowconc,ymax=highconc), fill = "#7AA6DCFF",alpha=0.2) +

theme_bw(base_size = 30) +

labs(title = "Study11. SA 300mg")+

scale_x_continuous("Time (h)", limits = c(-0.1,24.1), breaks = c(0,4,8,12,16,20,24)) +

scale_y_continuous("Concentration (mg/L)",limits = c(-0.1,12), breaks = c(0,2.5,5,7.5,10)) +

theme (legend.position = "none",

plot.background = element_blank(),

panel.grid.minor = element_blank(),

panel.grid.major = element_blank())

pl26

jpeg(filename = paste0(output_dir,"/11.Gao_SA.jpg"),

width=5000, height=4500, res=300)

print(pl26)

dev.off()

#NAT2IA----------

# Typical patient1: NAT2_IA

# Dose: oral 300mg qd

# BW: 60 kg

BW <- 60

#Define fixed effect parameters

theta <- c(TVCL=16.0*(BW/50)^0.55,

TVV2=21.2,

TVQ =8.7,

TVV3=125.8,

TVKA=0.68)

#Perform simulation

#Total number of subject: 1000

sim27 <- rxSolve(mod11, theta, ev11, omega=omega, sigma=sigma, nSub=1000)

#Concerntration

pkIA_60kg <- sim27 %>%

group_by(time) %>%

# 10-90% Prediction interval

summarise(medconc = median(cp),

lowconc = quantile(cp,0.1),

highconc = quantile(cp, 0.9)) %>%

ungroup() %>%

# time after last dose

mutate(tald = time-648)

#make the margin smooth by lowess

l0.1 <- lowess(pkIA_60kg$tald, pkIA_60kg$lowconc, f=0.04)

l0.5 <- lowess(pkIA_60kg$tald, pkIA_60kg$medconc, f=0.04)

l0.9 <- lowess(pkIA_60kg$tald, pkIA_60kg$highconc, f=0.04)

df0.1 <- data.frame(tald=l0.1$x, lowconc=l0.1$y)

df0.5 <- data.frame(tald=l0.5$x, medconc=l0.5$y)

df0.9 <- data.frame(tald=l0.9$x, highconc=l0.9$y)

pkIA_60kg <- df0.1 %>%

left_join(df0.5,by="tald") %>%

left_join(df0.9,by="tald") %>%

mutate(lowconc=case_when(lowconc<=0~0,TRUE~as.numeric(lowconc)))

dat27 <- pkIA_60kg %>%

mutate(

Study = "Gao Y. (2021)",

drug = "Isoniazid",

pop = "NAT2_IA"

)

#---------------output-----------------####

#y_breaks <- c()

label_name <- c("Gao Y. (2021)")

# concentration

pl27 <- pkIA_60kg %>%

ggplot(mapping=aes(x=tald, y=medconc)) +

geom_line(size=1.0, color="#4A6990FF") +

geom_ribbon(aes(x=tald,ymin=lowconc,ymax=highconc), fill = "#7AA6DCFF",alpha=0.2) +

theme_bw(base_size = 30) +

labs(title = "Study11. IA 300mg")+

scale_x_continuous("Time (h)", limits = c(-0.1,24.1), breaks = c(0,4,8,12,16,20,24)) +

scale_y_continuous("Concentration (mg/L)",limits = c(-0.1,12), breaks = c(0,2.5,5,7.5,10)) +

theme (legend.position = "none",

plot.background = element_blank(),

panel.grid.minor = element_blank(),

panel.grid.major = element_blank())

pl27

jpeg(filename = paste0(output_dir,"/11.Gao_IA.jpg"),

width=5000, height=4500, res=300)

print(pl27)

dev.off()

#NAT2RA----------

# Typical patient1: NAT2_IA

# Dose: oral 300mg qd

# BW: 60 kg

BW <- 60

#Define fixed effect parameters

theta <- c(TVCL=30.6*(BW/50)^0.55,

TVV2=21.2,

TVQ =8.7,

TVV3=125.8,

TVKA=0.68)

#Perform simulation

#Total number of subject: 1000

sim28 <- rxSolve(mod11, theta, ev11, omega=omega, sigma=sigma, nSub=1000)

#Concerntration

pkRA_60kg <- sim28 %>%

group_by(time) %>%

# 10-90% Prediction interval

summarise(medconc = median(cp),

lowconc = quantile(cp,0.1),

highconc = quantile(cp, 0.9)) %>%

ungroup() %>%

# time after last dose

mutate(tald = time-648)

#make the margin smooth by lowess

l0.1 <- lowess(pkRA_60kg$tald, pkRA_60kg$lowconc, f=0.04)

l0.5 <- lowess(pkRA_60kg$tald, pkRA_60kg$medconc, f=0.04)

l0.9 <- lowess(pkRA_60kg$tald, pkRA_60kg$highconc, f=0.04)

df0.1 <- data.frame(tald=l0.1$x, lowconc=l0.1$y)

df0.5 <- data.frame(tald=l0.5$x, medconc=l0.5$y)

df0.9 <- data.frame(tald=l0.9$x, highconc=l0.9$y)

pkRA_60kg <- df0.1 %>%

left_join(df0.5,by="tald") %>%

left_join(df0.9,by="tald") %>%

mutate(lowconc=case_when(lowconc<=0~0,TRUE~as.numeric(lowconc)))

dat28 <- pkRA_60kg %>%

mutate(

Study = "Gao Y. (2021)",

drug = "Isoniazid",

pop = "NAT2_RA"

)

#---------------output-----------------####

#y_breaks <- c()

label_name <- c("Gao Y. (2021)")

# concentration

pl28 <- pkRA_60kg %>%

ggplot(mapping=aes(x=tald, y=medconc)) +

geom_line(size=1.0, color="#4A6990FF") +

geom_ribbon(aes(x=tald,ymin=lowconc,ymax=highconc), fill = "#7AA6DCFF",alpha=0.2) +

theme_bw(base_size = 30) +

labs(title = "Study11. RA 300mg")+

scale_x_continuous("Time (h)", limits = c(-0.1,24.1), breaks = c(0,4,8,12,16,20,24)) +

scale_y_continuous("Concentration (mg/L)",limits = c(-0.1,12), breaks = c(0,2.5,5,7.5,10)) +

theme (legend.position = "none",

plot.background = element_blank(),

panel.grid.minor = element_blank(),

panel.grid.major = element_blank())

pl28

jpeg(filename = paste0(output_dir,"/11.Gao_RA.jpg"),

width=5000, height=4500, res=300)

print(pl28)

dev.off()

# 12.## Sundell J. (2020)## Rwanda------------------

# Define model -------------------------

# CL = 9.2*NAT2*(BW/50)^0.75 (L/h)

# NAT2 = 1 SA; 1.32 IA; 2.29 RA

# F = 1 FIX

# V2 = 41.3 * (BW/50)^1 (L)

# MTT = 0.58 (h)

# NN = 1 FIX

# KA = KTR

# Q = 10.8 * (BW/50)^0.75 (L/h)

# V3 = 42.8 * (BW/50)^1 (L)

# prop.err.sd = 34%

# BSV (CV%): CL = 82.7%

# BSV (CV%): Q = 120.6%

# BSV (CV%): MTT= 180.6%

# Typical patient1: NAT2_SA

# Typical patient2: NAT2_IA

# Typical patient3: NAT2_RA

# Dose: oral 300mg qd

# Body Weight: 60kg

set.seed(90401)

rxSetSeed(90401)

mod12 <- RxODE({

CL = TVCL * exp(eta.CL);

V2 = TVV2;

Q = TVQ * exp(eta.Q);

V3 = TVV3;

bio = 1;

mtt = 0.58 * exp(eta.MTT);

n = 1;

ktr = (n+1)/mtt;

KA = ktr;

C2 = centr/V2;

C3 = peri/V3 ;

d/dt(depot) = transit(n,mtt,bio) - KA * depot;

d/dt(centr) = KA * depot - CL * C2 + Q * (C3 - C2);

d/dt(peri) = Q * C2 - Q * C3;

cp = C2 * (1 + prop.err.sd)

})

#NAT2SA----------

# Typical patient1: NAT2_SA

# Dose: oral 300mg qd

# Body Weight: 60kg

BW <- 60 #kg

NAT2 <- 1

#Define fixed effect parameters

theta <- c(TVCL=9.2*(BW/50)^0.75*NAT2,

TVV2=41.3*(BW/50)^1,

TVQ =10.8*(BW/50)^0.75,

TVV3=42.8*(BW/50)^1)

# Define between subject variability

omega <- lotri(eta.CL ~ 0.827^2,

eta.Q ~ 1.206^2,

eta.MTT~ 1.806^2)

#Define unexplained variability

sigma <- lotri(prop.err.sd ~ 0.34)

#Dose of Oral input qd--------------------

dose_300_qd <- 300 #300mg/d

#Define event record

ev12 <- et(amount.units = "mg", time.units = "hours") %>%

add.dosing(dosing.to = "depot",

dose = dose_300_qd,

nbr.doses = 28,

dosing.interval = 24,

start.time = 0) %>%

#0-24h after the last dose

add.sampling(seq(from = 648, to = 672, by = 0.1))

#Perform simulation

#Total number of subject: 1000

sim29 <- rxSolve(mod12, theta, ev12, omega=omega, sigma=sigma, nSub=1000)

#Concerntration

pkSA_60kg <- sim29 %>%

group_by(time) %>%

# 10-90% Prediction interval

summarise(medconc = median(cp),

lowconc = quantile(cp,0.1),

highconc = quantile(cp, 0.9)) %>%

ungroup() %>%

# time after last dose

mutate(tald = time-648)

#make the margin smooth by lowess

l0.1 <- lowess(pkSA_60kg$tald, pkSA_60kg$lowconc, f=0.02)

l0.5 <- lowess(pkSA_60kg$tald, pkSA_60kg$medconc, f=0.02)

l0.9 <- lowess(pkSA_60kg$tald, pkSA_60kg$highconc, f=0.02)

df0.1 <- data.frame(tald=l0.1$x, lowconc=l0.1$y)

df0.5 <- data.frame(tald=l0.5$x, medconc=l0.5$y)

df0.9 <- data.frame(tald=l0.9$x, highconc=l0.9$y)

pkSA_60kg <- df0.1 %>%

left_join(df0.5,by="tald") %>%

left_join(df0.9,by="tald") %>%

mutate(lowconc=case_when(lowconc<=0~0,TRUE~as.numeric(lowconc)))

dat29 <- pkSA_60kg %>%

mutate(

Study = "Sundell J. (2020)",

drug = "Isoniazid",

pop = "NAT2_SA"

)

#---------------output-----------------####

#y_breaks <- c()

label_name <- c("Sundell J. (2020)")

# concentration

pl29 <- pkSA_60kg %>%

ggplot(mapping=aes(x=tald, y=medconc)) +

geom_line(size=1.0, color="#4A6990FF") +

geom_ribbon(aes(x=tald,ymin=lowconc,ymax=highconc), fill = "#7AA6DCFF",alpha=0.2) +

theme_bw(base_size = 30) +

labs(title = "Study12. SA 300mg")+

scale_x_continuous("Time (h)", limits = c(-0.1,24.1), breaks = c(0,4,8,12,16,20,24)) +

scale_y_continuous("Concentration (mg/L)",limits = c(-0.1,12), breaks = c(0,2.5,5,7.5,10)) +

theme (legend.position = "none",

plot.background = element_blank(),

panel.grid.minor = element_blank(),

panel.grid.major = element_blank())

pl29

jpeg(filename = paste0(output_dir,"/12.Sundell_SA300mg.jpg"),

width=5000, height=4500, res=300)

print(pl29)

dev.off()

#NAT2IA----------

# Typical patient1: NAT2_IA

# Dose: oral 300mg qd

# Body Weight: 60kg

BW <- 60 #kg

NAT2 <- 1.32

#Define fixed effect parameters

theta <- c(TVCL=9.2*(BW/50)^0.75*NAT2,

TVV2=41.3*(BW/50)^1,

TVQ =10.8*(BW/50)^0.75,

TVV3=42.8*(BW/50)^1)

#Perform simulation

#Total number of subject: 1000

sim30 <- rxSolve(mod12, theta, ev12, omega=omega, sigma=sigma, nSub=1000)

#Concerntration

pkIA_60kg <- sim30 %>%

group_by(time) %>%

# 10-90% Prediction interval

summarise(medconc = median(cp),

lowconc = quantile(cp,0.1),

highconc = quantile(cp, 0.9)) %>%

ungroup() %>%

# time after last dose

mutate(tald = time-648)

#make the margin smooth by lowess

l0.1 <- lowess(pkIA_60kg$tald, pkIA_60kg$lowconc, f=0.04)

l0.5 <- lowess(pkIA_60kg$tald, pkIA_60kg$medconc, f=0.04)

l0.9 <- lowess(pkIA_60kg$tald, pkIA_60kg$highconc, f=0.04)

df0.1 <- data.frame(tald=l0.1$x, lowconc=l0.1$y)

df0.5 <- data.frame(tald=l0.5$x, medconc=l0.5$y)

df0.9 <- data.frame(tald=l0.9$x, highconc=l0.9$y)

pkIA_60kg <- df0.1 %>%

left_join(df0.5,by="tald") %>%

left_join(df0.9,by="tald") %>%

mutate(lowconc=case_when(lowconc<=0~0,TRUE~as.numeric(lowconc)))

dat30 <- pkIA_60kg %>%

mutate(

Study = "Sundell J. (2020)",

drug = "Isoniazid",

pop = "NAT2_IA"

)

#---------------output-----------------####

#y_breaks <- c()

label_name <- c("Sundell J. (2020)")

# concentration

pl30 <- pkIA_60kg %>%

ggplot(mapping=aes(x=tald, y=medconc)) +

geom_line(size=1.0, color="#4A6990FF") +

geom_ribbon(aes(x=tald,ymin=lowconc,ymax=highconc), fill = "#7AA6DCFF",alpha=0.2) +

theme_bw(base_size = 30) +

labs(title = "Study12. IA 300mg")+

scale_x_continuous("Time (h)", limits = c(-0.1,24.1), breaks = c(0,4,8,12,16,20,24)) +

scale_y_continuous("Concentration (mg/L)",limits = c(-0.1,12), breaks = c(0,2.5,5,7.5,10)) +

theme (legend.position = "none",

plot.background = element_blank(),

panel.grid.minor = element_blank(),

panel.grid.major = element_blank())

pl30

jpeg(filename = paste0(output_dir,"/12.Sundell_IA300mg.jpg"),

width=5000, height=4500, res=300)

print(pl30)

dev.off()

#NAT2RA----------

# Typical patient1: NAT2_RA

# Dose: oral 300mg qd

# Body Weight: 60kg

BW <- 60 #kg

NAT2 <- 2.29

#Define fixed effect parameters

theta <- c(TVCL=9.2*(BW/50)^0.75*NAT2,

TVV2=41.3*(BW/50)^1,

TVQ =10.8*(BW/50)^0.75,

TVV3=42.8*(BW/50)^1)

#Perform simulation

#Total number of subject: 1000

sim31 <- rxSolve(mod12, theta, ev12, omega=omega, sigma=sigma, nSub=1000)

#Concerntration

pkRA_60kg <- sim31 %>%

group_by(time) %>%

# 10-90% Prediction interval

summarise(medconc = median(cp),

lowconc = quantile(cp,0.1),

highconc = quantile(cp, 0.9)) %>%

ungroup() %>%

# time after last dose

mutate(tald = time-648)

#make the margin smooth by lowess

l0.1 <- lowess(pkRA_60kg$tald, pkRA_60kg$lowconc, f=0.04)

l0.5 <- lowess(pkRA_60kg$tald, pkRA_60kg$medconc, f=0.04)

l0.9 <- lowess(pkRA_60kg$tald, pkRA_60kg$highconc, f=0.04)

df0.1 <- data.frame(tald=l0.1$x, lowconc=l0.1$y)

df0.5 <- data.frame(tald=l0.5$x, medconc=l0.5$y)

df0.9 <- data.frame(tald=l0.9$x, highconc=l0.9$y)

pkRA_60kg <- df0.1 %>%

left_join(df0.5,by="tald") %>%

left_join(df0.9,by="tald") %>%

mutate(lowconc=case_when(lowconc<=0~0,TRUE~as.numeric(lowconc)))

dat31 <- pkRA_60kg %>%

mutate(

Study = "Sundell J. (2020)",

drug = "Isoniazid",

pop = "NAT2_RA"

)

#---------------output-----------------####

#y_breaks <- c()

label_name <- c("Sundell J. (2020)")

# concentration

pl31 <- pkRA_60kg %>%

ggplot(mapping=aes(x=tald, y=medconc)) +

geom_line(size=1.0, color="#4A6990FF") +

geom_ribbon(aes(x=tald,ymin=lowconc,ymax=highconc), fill = "#7AA6DCFF",alpha=0.2) +

theme_bw(base_size = 30) +

labs(title = "Study12. RA 300mg")+

scale_x_continuous("Time (h)", limits = c(-0.1,24.1), breaks = c(0,4,8,12,16,20,24)) +

scale_y_continuous("Concentration (mg/L)",limits = c(-0.1,12), breaks = c(0,2.5,5,7.5,10)) +

theme (legend.position = "none",

plot.background = element_blank(),

panel.grid.minor = element_blank(),

panel.grid.major = element_blank())

pl31

jpeg(filename = paste0(output_dir,"/12.Sundell_RA300mg.jpg"),

width=5000, height=4500, res=300)

print(pl31)

dev.off()

# 13.## Cho Y. S. (2021)## South Korea# ----------

# Define model ----------

# CL = 22.2*(1-NAT2)*(FFM/50)^0.75 (L/h)

# V2 = 16.5 * (FFM/50)^1 (L)

# Q = 18.45 (L/h)

# V3 = 36.4 (L)

# Ka = 1.21 (h-1)

# Tlag = 0.02 FIX (h)

# D0 = 0.47 (h)

# BSV (CV%): CL = 14%

# BSV (CV%): V2 = 3% FIX

# BSV (CV%): V3 = 15% FIX

# BOV (CV%): D0 = 20%

# BOV (CV%): Tlag = 22%

# BSV (CV%): KA = 60%

# add.err.sd = 0.134 mg/L

# prop.err.sd = 29.2 %

# NAT2: SA(0.646), IA(0.274), RA(0)

# Typical patient1: NAT2_SA

# Typical patient2: NAT2_IA

# Typical patient3: NAT2_RA

# Dose: oral 150mg qd

set.seed(90401)

rxSetSeed(90401)

mod13 <- RxODE({

CL = TVCL * exp(eta.CL);

V2 = TVV2 * exp(eta.V2);

Q = TVQ

V3 = TVV3 * exp(eta.V3);

KA = TVKA * exp(eta.KA);

## Added modeled F, DUR and Rate

durDepot = TVDUR * exp(eta.DUR);

alagDepot = TVTLAG * exp(eta.TLAG);

C2 = centr/V2;

C3 = peri/V3 ;

d/dt(depot) = -KA * depot;

dur(depot) = durDepot

alag(depot) = alagDepot

d/dt(centr) = KA * depot - CL * C2 + Q * (C3 - C2);

d/dt(peri) = Q * C2 - Q * C3;

cp = C2 * (1+prop.err.sd) + add.err.sd

})

#NAT2_SA 46kg & 300mg----------

NAT2 <- 0.646

FFM <- 46

#Define fixed effect parameters

theta <- c(TVCL = 22.2*(1-NAT2)*(FFM/50)^0.75,

TVV2 = 16.5*(FFM/50),

TVQ = 18.4,

TVV3 = 36.4,

TVKA = 1.21,

TVTLAG = 0.02,

TVDUR = 0.47)

# Define between subject variability

omega <- lotri(eta.CL ~ 0.14^2,

eta.V2 ~ 0.03^2,

eta.V3 ~ 0.15^2,

eta.KA ~ 0.6^2,

eta.TLAG ~ 0.22 ^2,

eta.DUR ~ 0.2^2)

#Define unexplained variability

sigma <- lotri(add.err.sd ~ 0.134,

prop.err.sd ~ 0.292)

#Dose of Oral input qd--------------------

dose_300_qd <- 300 #300mg/d

#Define event record

ev13 <- et(amount.units = "mg", time.units = "hours") %>%

add.dosing(dosing.to = "depot",

dose = dose_300_qd,

nbr.doses = 28,

dosing.interval = 24,

start.time = 0) %>%

#0-24h after the last dose

add.sampling(seq(from = 648, to = 672, by = 0.1))

#Perform simulation

#Total number of subject: 1000

sim32 <- rxSolve(mod13, theta, ev13, omega=omega, sigma=sigma, nSub=1000)

#Concerntration

pkSA_qd <- sim32 %>%

group_by(time) %>%

# 10-90% Prediction interval

summarise(medconc = median(cp),

lowconc = quantile(cp,0.1),

highconc = quantile(cp, 0.9)) %>%

ungroup() %>%

# time after last dose

mutate(tald = time-648)

#make the margin smooth by lowess

l0.1 <- lowess(pkSA_qd$tald, pkSA_qd$lowconc, f=0.02)

l0.5 <- lowess(pkSA_qd$tald, pkSA_qd$medconc, f=0.02)

l0.9 <- lowess(pkSA_qd$tald, pkSA_qd$highconc, f=0.02)

df0.1 <- data.frame(tald=l0.1$x, lowconc=l0.1$y)

df0.5 <- data.frame(tald=l0.5$x, medconc=l0.5$y)

df0.9 <- data.frame(tald=l0.9$x, highconc=l0.9$y)

pkSA_dat <- df0.1 %>%

left_join(df0.5,by="tald") %>%

left_join(df0.9,by="tald") %>%

mutate(lowconc=case_when(lowconc<=0~0,TRUE~as.numeric(lowconc)))

dat32 <- pkSA_dat %>%

mutate(

Study = "Cho Y. S. (2021)",

drug = "Isoniazid",

pop = "NAT2_SA"

)

#---------------output-----------------####

#y_breaks <- c()

label_name <- c("Cho Y. S. (2021)")

# concentration

pl32 <- pkSA_dat %>%

ggplot(mapping=aes(x=tald, y=medconc)) +

geom_line(size=1.0, color="#4A6990FF") +

geom_ribbon(aes(x=tald,ymin=lowconc,ymax=highconc), fill = "#7AA6DCFF",alpha=0.2) +

theme_bw(base_size = 30) +

labs(title = "Study13. SA 300mg")+

scale_x_continuous("Time (h)", limits = c(-0.1,24.1), breaks = c(0,4,8,12,16,20,24)) +

scale_y_continuous("Concentration (mg/L)",limits = c(-0.1,10.5), breaks = c(0,2.5,5,7.5,10)) +

theme (legend.position = "none",

plot.background = element_blank(),

panel.grid.minor = element_blank(),

panel.grid.major = element_blank())

pl32

jpeg(filename = paste0(output_dir,"/13.Cho2021_SA300mg_46kg.jpg"),

width=5000, height=4500, res=300)

print(pl32)

dev.off()

#NAT2_IA 46kg & 300mg----------

NAT2 <- 0.274

FFM <- 46

#Define fixed effect parameters

theta <- c(TVCL = 22.2*(1-NAT2)*(FFM/50)^0.75,

TVV2 = 16.5*(FFM/50),

TVQ = 18.4,

TVV3 = 36.4,

TVKA = 1.21,

TVTLAG = 0.02,

TVDUR = 0.47)

#Total number of subject: 1000

sim33 <- rxSolve(mod13, theta, ev13, omega=omega, sigma=sigma, nSub=1000)

#Concerntration

pkIA_qd <- sim33 %>%

group_by(time) %>%

# 10-90% Prediction interval

summarise(medconc = median(cp),

lowconc = quantile(cp,0.1),

highconc = quantile(cp, 0.9)) %>%

ungroup() %>%

# time after last dose

mutate(tald = time-648)

#make the margin smooth by lowess

l0.1 <- lowess(pkIA_qd$tald, pkIA_qd$lowconc, f=0.02)

l0.5 <- lowess(pkIA_qd$tald, pkIA_qd$medconc, f=0.02)

l0.9 <- lowess(pkIA_qd$tald, pkIA_qd$highconc, f=0.02)

df0.1 <- data.frame(tald=l0.1$x, lowconc=l0.1$y)

df0.5 <- data.frame(tald=l0.5$x, medconc=l0.5$y)

df0.9 <- data.frame(tald=l0.9$x, highconc=l0.9$y)

pkIA_qd <- df0.1 %>%

left_join(df0.5,by="tald") %>%

left_join(df0.9,by="tald") %>%

mutate(lowconc=case_when(lowconc<=0~0,TRUE~as.numeric(lowconc)))

dat33 <- pkIA_qd %>%

mutate(

Study = "Cho Y. S. (2021)",

drug = "Isoniazid",

pop = "NAT2_IA"

)

#---------------output-----------------####

#y_breaks <- c()

label_name <- c("Cho Y. S. (2021)")

# concentration

pl33 <- pkIA_qd %>%

ggplot(mapping=aes(x=tald, y=medconc)) +

geom_line(size=1.0, color="#4A6990FF") +

geom_ribbon(aes(x=tald,ymin=lowconc,ymax=highconc), fill = "#7AA6DCFF",alpha=0.2) +

theme_bw(base_size = 30) +

labs(title = "Study13. IA 300mg")+

scale_x_continuous("Time (h)", limits = c(-0.1,24.1), breaks = c(0,4,8,12,16,20,24)) +

scale_y_continuous("Concentration (mg/L)",limits = c(-0.1,10.5), breaks = c(0,2.5,5,7.5,10)) +

theme (legend.position = "none",

plot.background = element_blank(),

panel.grid.minor = element_blank(),

panel.grid.major = element_blank())

pl33

jpeg(filename = paste0(output_dir,"/13.Cho2021_IA300mg_46kg.jpg"),

width=5000, height=4500, res=300)

print(pl33)

dev.off()

#NAT2_RA 46kg & 300mg----------

NAT2 <- 0

FFM <- 46

#Define fixed effect parameters

theta <- c(TVCL = 22.2*(1-NAT2)*(FFM/50)^0.75,

TVV2 = 16.5*(FFM/50),

TVQ = 18.4,

TVV3 = 36.4,

TVKA = 1.21,

TVTLAG = 0.02,

TVDUR = 0.47)

#Total number of subject: 1000

sim34 <- rxSolve(mod13, theta, ev13, omega=omega, sigma=sigma, nSub=1000)

#Concerntration

pkRA_qd <- sim34 %>%

group_by(time) %>%

# 10-90% Prediction interval

summarise(medconc = median(cp),

lowconc = quantile(cp,0.1),

highconc = quantile(cp, 0.9)) %>%

ungroup() %>%

# time after last dose

mutate(tald = time-648)

#make the margin smooth by lowess

l0.1 <- lowess(pkRA_qd$tald, pkRA_qd$lowconc, f=0.02)

l0.5 <- lowess(pkRA_qd$tald, pkRA_qd$medconc, f=0.02)

l0.9 <- lowess(pkRA_qd$tald, pkRA_qd$highconc, f=0.02)

df0.1 <- data.frame(tald=l0.1$x, lowconc=l0.1$y)

df0.5 <- data.frame(tald=l0.5$x, medconc=l0.5$y)

df0.9 <- data.frame(tald=l0.9$x, highconc=l0.9$y)

pkRA_qd <- df0.1 %>%

left_join(df0.5,by="tald") %>%

left_join(df0.9,by="tald") %>%

mutate(lowconc=case_when(lowconc<=0~0,TRUE~as.numeric(lowconc)))

dat34 <- pkRA_qd %>%

mutate(

Study = "Cho Y. S. (2021)",

drug = "Isoniazid",

pop = "NAT2_RA"

)

#---------------output-----------------####

#y_breaks <- c()

label_name <- c("Cho Y. S. (2021)")

# concentration

pl34 <- pkRA_qd %>%

ggplot(mapping=aes(x=tald, y=medconc)) +

geom_line(size=1.0, color="#4A6990FF") +

geom_ribbon(aes(x=tald,ymin=lowconc,ymax=highconc), fill = "#7AA6DCFF",alpha=0.2) +

theme_bw(base_size = 30) +

labs(title = "Study13. RA 300mg")+

scale_x_continuous("Time (h)", limits = c(-0.1,24.1), breaks = c(0,4,8,12,16,20,24)) +

scale_y_continuous("Concentration (mg/L)",limits = c(-0.1,10.5), breaks = c(0,2.5,5,7.5,10)) +

theme (legend.position = "none",

plot.background = element_blank(),

panel.grid.minor = element_blank(),

panel.grid.major = element_blank())

pl34

jpeg(filename = paste0(output_dir,"/13.Cho2021_RA300mg_46kg.jpg"),

width=5000, height=4500, res=300)

print(pl34)

dev.off()

# 14.## Naidoo A. (2019)## South Africa------------------

# Define model -------------------------------

# CL_SA = 17.4 * (FFM/47)^0.55 (L/h)

# CL_IA = 28.4 * (FFM/47)^0.55 (L/h)

# CL_RA = 40.5 * (FFM/47)^0.55 (L/h)

# V2 = 73.4 * (FFM/47) (L)

# KA = 0.13

# Q = 1.1 * (FFM/47)^0.75 (L/h)

# V3 = 19.8 * (FFM/47) (L)

# F = 1 FIX

# BOV (CV%): CL = 13.0%

# BSV (CV%): V2 = 26.3%

# BOV (CV%): KA = 23.5%

# BOV (CV%): F = 27.4%

# Add.err.sd = 0.178

# Typical patient1: NAT2_SA

# Typical patient2: NAT2_IA

# Typical patient3: NAT2_RA

# FFM : 46 kg

# Dose: oral 300mg qd

set.seed(90401)

rxSetSeed(90401)

mod14 <- RxODE({

CL = TVCL * exp(iov.CL);

V2 = TVV2 * exp(eta.V2);

Q = TVQ ;

V3 = TVV3;

KA = TVKA * exp(iov.KA);

bio = 1 * exp(iov.BIO);

C2 = centr/V2;

C3 = peri/V3 ;

d/dt(depot) = -KA * depot;

d/dt(centr) = bio * KA * depot - CL * C2 + Q * (C3 - C2);

d/dt(peri) = Q * C2 - Q * C3;

cp = C2 * (1 + prop.err.sd) + add.err.sd

})

#NAT2SA----------

# Typical patient1: NAT2_SA

# Dose: oral 300mg qd

# FFM： 46 kg

FFM <- 46

#Define fixed effect parameters

theta <- c(TVCL=17.4*(FFM/47)^0.75,

TVV2=73.4*(FFM/47),

TVQ =1*(FFM/47)^0.75,

TVV3=19.8*(FFM/47),

TVKA=0.13)

# Define between subject variability

omega <- lotri(iov.CL ~ 0.13^2,

eta.V2 ~ 0.263^2,

iov.KA ~ 0.235^2,

iov.BIO~ 0.274^2)

#Define unexplained variability

sigma <- lotri(prop.err.sd ~ 0.193, add.err.sd ~ 0.178)

#Dose of Oral input qd--------------------

dose_300_qd <- 300 #300mg/d

#Define event record

ev14 <- et(amount.units = "mg", time.units = "hours") %>%

add.dosing(dosing.to = "depot",

dose = dose_300_qd,

nbr.doses = 28,

dosing.interval = 24,

start.time = 0) %>%

#0-24h after the last dose

add.sampling(seq(from = 648, to = 672, by = 0.5))

#Perform simulation

#Total number of subject: 1000

sim35 <- rxSolve(mod14, theta, ev14, omega=omega, sigma=sigma, nSub=1000)

#Concerntration

pkSA_60kg <- sim35 %>%

group_by(time) %>%

# 10-90% Prediction interval

summarise(medconc = median(cp),

lowconc = quantile(cp,0.1),

highconc = quantile(cp, 0.9)) %>%

ungroup() %>%

# time after last dose

mutate(tald = time-648)

#make the margin smooth by lowess

l0.1 <- lowess(pkSA_60kg$tald, pkSA_60kg$lowconc, f=0.04)

l0.5 <- lowess(pkSA_60kg$tald, pkSA_60kg$medconc, f=0.04)

l0.9 <- lowess(pkSA_60kg$tald, pkSA_60kg$highconc, f=0.04)

df0.1 <- data.frame(tald=l0.1$x, lowconc=l0.1$y)

df0.5 <- data.frame(tald=l0.5$x, medconc=l0.5$y)

df0.9 <- data.frame(tald=l0.9$x, highconc=l0.9$y)

pkSA_60kg <- df0.1 %>%

left_join(df0.5,by="tald") %>%

left_join(df0.9,by="tald") %>%

mutate(lowconc=case_when(lowconc<=0~0,TRUE~as.numeric(lowconc)))

dat35 <- pkSA_60kg %>%

mutate(

Study = "Naidoo A. (2019)",

drug = "Isoniazid",

pop = "NAT2_SA"

)

#---------------output-----------------####

#y_breaks <- c()

label_name <- c("Naidoo A. (2019)")

# concentration

pl35 <- pkSA_60kg %>%

ggplot(mapping=aes(x=tald, y=medconc)) +

geom_line(size=1.0, color="#4A6990FF") +

geom_ribbon(aes(x=tald,ymin=lowconc,ymax=highconc), fill = "#7AA6DCFF",alpha=0.2) +

theme_bw(base_size = 30) +

labs(title = "Study14. SA 300mg")+

scale_x_continuous("Time (h)", limits = c(-0.1,24.1), breaks = c(0,4,8,12,16,20,24)) +

scale_y_continuous("Concentration (mg/L)",limits = c(-0.1,12), breaks = c(0,2.5,5,7.5,10)) +

theme (legend.position = "none",

plot.background = element_blank(),

panel.grid.minor = element_blank(),

panel.grid.major = element_blank())

pl35

jpeg(filename = paste0(output_dir,"/14.Naidoo_SA.jpg"),

width=5000, height=4500, res=300)

print(pl35)

dev.off()

#NAT2IA----------

# Typical patient1: NAT2_IA

# Dose: oral 300mg qd

# FFM： 46 kg

FFM <- 46

#Define fixed effect parameters

theta <- c(TVCL=28.4*(FFM/47)^0.75,

TVV2=73.4*(FFM/47),

TVQ =1*(FFM/47)^0.75,

TVV3=19.8*(FFM/47),

TVKA=0.13)

#Perform simulation

#Total number of subject: 1000

sim36 <- rxSolve(mod14, theta, ev14, omega=omega, sigma=sigma, nSub=1000)

#Concerntration

pkIA_60kg <- sim36 %>%

group_by(time) %>%

# 10-90% Prediction interval

summarise(medconc = median(cp),

lowconc = quantile(cp,0.1),

highconc = quantile(cp, 0.9)) %>%

ungroup() %>%

# time after last dose

mutate(tald = time-648)

#make the margin smooth by lowess

l0.1 <- lowess(pkIA_60kg$tald, pkIA_60kg$lowconc, f=0.04)

l0.5 <- lowess(pkIA_60kg$tald, pkIA_60kg$medconc, f=0.04)

l0.9 <- lowess(pkIA_60kg$tald, pkIA_60kg$highconc, f=0.04)

df0.1 <- data.frame(tald=l0.1$x, lowconc=l0.1$y)

df0.5 <- data.frame(tald=l0.5$x, medconc=l0.5$y)

df0.9 <- data.frame(tald=l0.9$x, highconc=l0.9$y)

pkIA_60kg <- df0.1 %>%

left_join(df0.5,by="tald") %>%

left_join(df0.9,by="tald") %>%

mutate(lowconc=case_when(lowconc<=0~0,TRUE~as.numeric(lowconc)))

dat36 <- pkIA_60kg %>%

mutate(

Study = "Naidoo A. (2019)",

drug = "Isoniazid",

pop = "NAT2_IA"

)

#---------------output-----------------####

#y_breaks <- c()

label_name <- c("Naidoo A. (2019)")

# concentration

pl36 <- pkIA_60kg %>%

ggplot(mapping=aes(x=tald, y=medconc)) +

geom_line(size=1.0, color="#4A6990FF") +

geom_ribbon(aes(x=tald,ymin=lowconc,ymax=highconc), fill = "#7AA6DCFF",alpha=0.2) +

theme_bw(base_size = 30) +

labs(title = "Study14. IA 300mg")+

scale_x_continuous("Time (h)", limits = c(-0.1,24.1), breaks = c(0,4,8,12,16,20,24)) +

scale_y_continuous("Concentration (mg/L)",limits = c(-0.1,12), breaks = c(0,2.5,5,7.5,10)) +

theme (legend.position = "none",

plot.background = element_blank(),

panel.grid.minor = element_blank(),

panel.grid.major = element_blank())

pl36

jpeg(filename = paste0(output_dir,"/14.Naidoo_IA.jpg"),

width=5000, height=4500, res=300)

print(pl36)

dev.off()

#NAT2RA----------

# Typical patient1: NAT2_RA

# Dose: oral 300mg qd

# FFM： 46 kg

FFM <- 46

#Define fixed effect parameters

theta <- c(TVCL=40.5*(FFM/47)^0.75,

TVV2=73.4*(FFM/47),

TVQ =1*(FFM/47)^0.75,

TVV3=19.8*(FFM/47),

TVKA=0.13)

#Perform simulation

#Total number of subject: 1000

sim37 <- rxSolve(mod14, theta, ev14, omega=omega, sigma=sigma, nSub=1000)

#Concerntration

pkRA_60kg <- sim37 %>%

group_by(time) %>%

# 10-90% Prediction interval

summarise(medconc = median(cp),

lowconc = quantile(cp,0.1),

highconc = quantile(cp, 0.9)) %>%

ungroup() %>%

# time after last dose

mutate(tald = time-648)

#make the margin smooth by lowess

l0.1 <- lowess(pkRA_60kg$tald, pkRA_60kg$lowconc, f=0.04)

l0.5 <- lowess(pkRA_60kg$tald, pkRA_60kg$medconc, f=0.04)

l0.9 <- lowess(pkRA_60kg$tald, pkRA_60kg$highconc, f=0.04)

df0.1 <- data.frame(tald=l0.1$x, lowconc=l0.1$y)

df0.5 <- data.frame(tald=l0.5$x, medconc=l0.5$y)

df0.9 <- data.frame(tald=l0.9$x, highconc=l0.9$y)

pkRA_60kg <- df0.1 %>%

left_join(df0.5,by="tald") %>%

left_join(df0.9,by="tald") %>%

mutate(lowconc=case_when(lowconc<=0~0,TRUE~as.numeric(lowconc)))

dat37 <- pkRA_60kg %>%

mutate(

Study = "Naidoo A. (2019)",

drug = "Isoniazid",

pop = "NAT2_RA"

)

#---------------output-----------------####

#y_breaks <- c()

label_name <- c("Naidoo A. (2019)")

# concentration

pl37 <- pkRA_60kg %>%

ggplot(mapping=aes(x=tald, y=medconc)) +

geom_line(size=1.0, color="#4A6990FF") +

geom_ribbon(aes(x=tald,ymin=lowconc,ymax=highconc), fill = "#7AA6DCFF",alpha=0.2) +

theme_bw(base_size = 30) +

labs(title = "Study14. RA 300mg")+

scale_x_continuous("Time (h)", limits = c(-0.1,24.1), breaks = c(0,4,8,12,16,20,24)) +

scale_y_continuous("Concentration (mg/L)",limits = c(-0.1,12), breaks = c(0,2.5,5,7.5,10)) +

theme (legend.position = "none",

plot.background = element_blank(),

panel.grid.minor = element_blank(),

panel.grid.major = element_blank())

pl37

jpeg(filename = paste0(output_dir,"/14.Naidoo_RA.jpg"),

width=5000, height=4500, res=300)

print(pl37)

dev.off()
